# Supplementary material
Source: Springer Nature journal article supplement (https://www.springermedizin.de/resource/supplementary/13075_2004_1584_MOESM3_ESM.pdf/9690110)
Supplement: MOESM3 [file 9690110]

Additional file 3: Detailed adverse event outcomes in each trial

| Study #<br>condition<br>duration | Patients and<br>methods                                                                                                                                                                                                                                          | Dosing<br>regimen,<br>numbers of<br>patients                                                                                                          | Withdrawals                                                                            |                                                                                       |                                                                                                                                                                                                                                                                                                                                                                                                                                                                                                                                                                              | Adverse Events                                                                                                                                                                                                                                                                                                                                                                                                                                                                                                                  |                                                                                                                                                                                                                                                                                              |                                                                                                                                                                                                   |                                                                                                                                                                                                                                                                                                                                                                                                                                                          |                                                                                                                                                                                                                                                                                                                                                                       |                                                                                                                                                                                                                        |                                                                                                             |                                                                                                          |
|----------------------------------|------------------------------------------------------------------------------------------------------------------------------------------------------------------------------------------------------------------------------------------------------------------|-------------------------------------------------------------------------------------------------------------------------------------------------------|----------------------------------------------------------------------------------------|---------------------------------------------------------------------------------------|------------------------------------------------------------------------------------------------------------------------------------------------------------------------------------------------------------------------------------------------------------------------------------------------------------------------------------------------------------------------------------------------------------------------------------------------------------------------------------------------------------------------------------------------------------------------------|---------------------------------------------------------------------------------------------------------------------------------------------------------------------------------------------------------------------------------------------------------------------------------------------------------------------------------------------------------------------------------------------------------------------------------------------------------------------------------------------------------------------------------|----------------------------------------------------------------------------------------------------------------------------------------------------------------------------------------------------------------------------------------------------------------------------------------------|---------------------------------------------------------------------------------------------------------------------------------------------------------------------------------------------------|----------------------------------------------------------------------------------------------------------------------------------------------------------------------------------------------------------------------------------------------------------------------------------------------------------------------------------------------------------------------------------------------------------------------------------------------------------|-----------------------------------------------------------------------------------------------------------------------------------------------------------------------------------------------------------------------------------------------------------------------------------------------------------------------------------------------------------------------|------------------------------------------------------------------------------------------------------------------------------------------------------------------------------------------------------------------------|-------------------------------------------------------------------------------------------------------------|----------------------------------------------------------------------------------------------------------|
|                                  |                                                                                                                                                                                                                                                                  |                                                                                                                                                       | All causes                                                                             | Lack of Efficacy                                                                      | Adverse event                                                                                                                                                                                                                                                                                                                                                                                                                                                                                                                                                                | General                                                                                                                                                                                                                                                                                                                                                                                                                                                                                                                         | GI-related                                                                                                                                                                                                                                                                                   | GI tolerability                                                                                                                                                                                   | Cardiorenal-related                                                                                                                                                                                                                                                                                                                                                                                                                                      | Laboratory<br>Tests                                                                                                                                                                                                                                                                                                                                                   | Treatment-<br>related                                                                                                                                                                                                  |                                                                                                             |                                                                                                          |
| <b>Osteoarthritis</b>            |                                                                                                                                                                                                                                                                  |                                                                                                                                                       |                                                                                        |                                                                                       |                                                                                                                                                                                                                                                                                                                                                                                                                                                                                                                                                                              |                                                                                                                                                                                                                                                                                                                                                                                                                                                                                                                                 |                                                                                                                                                                                                                                                                                              |                                                                                                                                                                                                   |                                                                                                                                                                                                                                                                                                                                                                                                                                                          |                                                                                                                                                                                                                                                                                                                                                                       |                                                                                                                                                                                                                        |                                                                                                             |                                                                                                          |
| <b>C-002</b><br>OA<br>12 weeks   | OA Hip/Knee (ACR), requiring NSAID, and with stable controlled hypertension and Type 2 diabetes<br>FCC 1-3<br>Washout 7-10 days<br>Double dummy method<br>Assessed at baseline, 6, 12 weeks<br>QS 5/5; VS 16/16                                                  | Cele<br>1x200mg/day (n=136)<br>Role<br>1x25mg/day (n=132)<br>Naprox<br>2x500mg/day (n=128)                                                            | Cele 30/136<br>Role 37/132<br>Naprox 32/128                                            | Cele 3/136<br>Role 1/132<br>Naprox 3/128                                              | Cele 6/136<br>Role 13/132<br>Naprox 10/128                                                                                                                                                                                                                                                                                                                                                                                                                                                                                                                                   | Any AE:<br>Cele 72/136<br>Role 71/132<br>Naprox 73/128<br>GI-related:<br>Cele 1/136<br>Role 1/132<br>Naprox 4/128<br>Serious:<br>Cele 4/136<br>Role 5/132 (1 MI, 1 aggravated hypertension)<br>Naprox 3/128<br>Serious UGI:<br>None                                                                                                                                                                                                                                                                                             | Dyspepsia:<br>Cele 1/136<br>Role 1/132<br>Naprox 1/128<br>Abdom Pain:<br>Cele 5/136<br>Role 5/132<br>Naprox 7/128<br>Nausea:<br>Cele 4/136<br>Role 7/132<br>Naprox 8/128<br>Diarrhoea:<br>Cele 6/136<br>Role 10/132<br>Naprox 4/128<br>Vomiting:<br>Cele 1/136<br>Role 2/132<br>Naprox 1/128 | Duodenal Ulcer:<br>Cele 1/136<br>Role 0/132<br>Naprox 0/128<br>Gastric erosion:<br>Cele 5/136<br>Role 11/132<br>Naprox 9/128                                                                      | Mod/severe<br>abdom pain,<br>nausea,<br>dyspepsia:<br>Cele 5/136<br>Role 10/132<br>Naprox 4/128<br>Elevated systolic BP:<br>Cele 10/132<br>Role 3/132<br>Naprox 2/128<br>Facial oedema:<br>Cele 1/136<br>Role 0/132<br>Naprox 0/128<br>Ankle oedema:<br>Cele 1/136<br>Role 0/132<br>Hypertension:<br>Cele 1/136<br>Role 0/132<br>Aggravated hypertension:<br>Cele 0/136<br>Role 3/132<br>Naprox 3/128<br>MI:<br>Cele 0/132<br>Role 1/132<br>Naprox 0/128 | From treatment emergent AEs<br>Oedema:<br>Cele 1/136<br>Role 3/132<br>Naprox 2/128<br>Facial oedema:<br>Cele 1/136<br>Role 0/132<br>Naprox 0/128<br>Ankle oedema:<br>Cele 1/136<br>Role 0/132<br>Hypertension:<br>Cele 1/136<br>Role 0/132<br>Aggravated hypertension:<br>Cele 0/136<br>Role 3/132<br>Naprox 3/128<br>MI:<br>Cele 0/132<br>Role 1/132<br>Naprox 0/128 | Non-significant<br>decreases in Hb<br>in each group                                                                                                                                                                    | All AEs:<br>Cele 5/136<br>Role 13/132<br>Nap 13/128<br>Serious:<br>Cele 0/136<br>Role 2/132<br>Naprox 0/128 |                                                                                                          |
| <b>C-003</b><br>OA<br>6 weeks    | OA knee (ACR) with flare, requiring daily NSAID/analgesic<br>FCC 1-3<br>Washout 2 days<br>Double dummy method<br>Assessed at baseline, 3, 6 weeks<br>QS 5/5; VS 16/16                                                                                            | Cele<br>1x200mg/day (n=189)<br>Role<br>1x25mg/day (n=190)<br>Naprox<br>2x500mg/day (n=96)                                                             | Cele 31/189<br>Role 29/190<br>Plac 34/98                                               | Cele 10/189<br>Role 10/190<br>Plac 21/96                                              | Cele 11/189<br>Role 10/190<br>Plac 5/96                                                                                                                                                                                                                                                                                                                                                                                                                                                                                                                                      | Any AE:<br>Cele 82/189<br>Role 80/190<br>Plac 29/92<br>GI-related:<br>Cele 5/189<br>Role 3/190<br>Plac 1/96<br>Serious:<br>Cele 3/189<br>Role 1/190<br>Plac 3/96<br>Serious UGI:<br>Cele 0/189<br>Role 0/190<br>Plac 1/96 (GIH)                                                                                                                                                                                                                                                                                                 | Dyspepsia:<br>Cele 11/189<br>Role 10/190<br>Plac 30/96<br>Abdom Pain:<br>Cele 5/189<br>Role 2/190<br>Plac 2/96<br>Nausea:<br>Cele 1/189<br>Role 3/190<br>Plac 1/96<br>Diarrhoea:<br>Cele 8/189<br>Role 5/190<br>Plac 1/96<br>Vomiting:<br>Cele 1/189<br>Role 0/190<br>Plac 0/96              | GI Haemorrhage:<br>Cele 0/189<br>Role 0/190<br>Plac 1/96<br>No ulcers or erosions                                                                                                                 | Mod/severe<br>abdom pain,<br>nausea,<br>dyspepsia:<br>Cele 6/189<br>Role 7/190<br>Plac 2/96                                                                                                                                                                                                                                                                                                                                                              | Peripheral<br>oedema:<br>Cele 5/189<br>Role 8/190<br>Plac 2/96<br>Generalised<br>oedema:<br>Cele 1/189<br>Role 3/190<br>Plac 0/96<br>Hypertension:<br>Cele 1/189<br>Role 6/190<br>Plac 0/96<br>Aggravated<br>hypertension:<br>Cele 1/189<br>Role 0/190<br>Plac 1/96                                                                                                   | Trial did not<br>report any cases<br>of heart failure                                                                                                                                                                  | No patient<br>withdrew due to<br>clinically relevant<br>laboratory values                                   | All AEs:<br>Cele 17/189<br>Role 15/190<br>Plac 4/96<br>Serious:<br>Cele 1/189<br>Role 0/190<br>Plac 0/96 |
| <b>C-010</b><br>OA<br>6 weeks    | Symptomatic OA hip/knee, K-L 2-4, requiring NSAID/analgesic<br>Initial pain intensity 40-90 on 100mm VAS<br>Washout 3 days or 5 x half-life<br>No investigational medication >30 days<br>Doble dummy method<br>Assessed at baseline, 6 weeks<br>QS 5/5; VS 16/16 | Cele<br>1x200mg/day (n=181)<br>Para<br>4x1000mg/day (n=171)<br>VAS<br>Plac (n=172)<br>1st treatment<br>period analysed                                | Cele 42/181<br>Para 42/171<br>Plac 50/172                                              | [consent<br>withdrawn]<br>Cele 14/181<br>Para 17/171<br>Plac 24/172                   | Any AE:<br>Cele 11/181<br>Para 15/171<br>Plac 12/172<br>GI-related:<br>Cele 5/181<br>Para 6/171<br>Plac 2/172<br>Serious:<br>Cele 0/181<br>Para 2/171<br>Plac 3/172<br>Serious UGI:<br>Cele 0/181<br>Para 0/171<br>Plac 1/172                                                                                                                                                                                                                                                                                                                                                | Any AE:<br>Cele 74/181<br>Para 75/171<br>Plac 17/172<br>GI-related:<br>Cele 3/181<br>Para 5/171<br>Plac 4/172<br>Diarrhoea:<br>Cele 6/181<br>Para 14/171<br>Plac 4/172<br>Abdom Pain:<br>Cele 1/181<br>Para 4/171<br>Plac 3/172<br>Vomiting:<br>Cele 1/181<br>Para 4/171<br>Plac 4/172                                                                                                                                                                                                                                          | Mod/severe<br>abdom pain,<br>nausea,<br>dyspepsia:<br>Cele 6/181<br>Para 7/171<br>Plac 2/172                                                                                                                                                                                                 | Periph<br>Oedema:<br>Cele 1/181<br>Para 0/172<br>Plac 0/172<br>Aggravated<br>hypertension:<br>Cele 0/181<br>Para 1/171<br>Plac 0/172                                                              | Cardiac failure:<br>Trial did not<br>report any cases                                                                                                                                                                                                                                                                                                                                                                                                    | Group mean data<br>given<br>Hct values<br>unchanged in<br>period 1. Very<br>small changes in<br>mean hb values<br>with no sig<br>difference<br>between groups                                                                                                                                                                                                         | All AEs:<br>Cele 24/181<br>Para 22/171<br>Plac 13/172<br>No serious AEs<br>were related to<br>the study<br>medication                                                                                                  |                                                                                                             |                                                                                                          |
| <b>C-013</b><br>OA<br>2 weeks    | OA (ACR) with flare<br>FCC 1-3<br>Assessment at baseline, 1, 2 weeks<br>Washout 2-14 days<br>Double dummy method<br>Assessed at baseline, 6 weeks<br>QS 5/5; VS 16/16                                                                                            | Cele [1]<br>2x40mg/day (n=73)<br>Cele [2]<br>2x100mg/day (n=75)<br>Cele [3]<br>2x200mg/day (n=73)<br>Plac (n=70)                                      | Cele [1] 9/73<br>Cele [2] 9/75<br>Cele [3] 6/73<br>Plac 15/70                          | Cele [1] 6/73<br>Cele [2] 1/75<br>Cele [3] 3/73<br>Plac 10/70                         | Cele [1] 0/73<br>Cele [2] 5/75<br>Cele [3] 3/73<br>Plac 2/70<br>GI-related:<br>Cele [1] 0/73<br>Cele [2] 1/75<br>Cele [3] 0/73<br>Plac 1/70<br>Serious:<br>Cele [1] 0/73<br>Cele [2] 1/75<br>Cele [3] 1/75<br>Plac 0/70<br>Serious UGI:<br>None reported<br>Serious CV:<br>Cele [1] 0/73<br>Cele [2] 0/75<br>Cele [3] 1/73<br>Plac 0/70<br>No vomiting<br>reported                                                                                                                                                                                                           | Any:<br>Cele [1] 30/73<br>Cele [2] 35/75<br>Cele [3] 36/73<br>Cele [3] 30/70<br>GI-related:<br>Cele [1] 0/73<br>Cele [1] 10/73<br>Cele [2] 15/75<br>Cele [3] 14/73<br>Plac 10/70<br>Nausea:<br>Cele [1] 2/73<br>Cele [2] 3/75<br>Cele [3] 3/73<br>Plac 7/70<br>Abdom pain:<br>Cele [1] 2/73<br>Cele [2] 2/75<br>Cele [3] 4/73<br>Plac 10/70<br>Nausea:<br>Cele [1] 3/73<br>Cele [2] 5/75<br>Cele [3] 2/73<br>Plac 0/70<br>Diarrhoea:<br>Cele [1] 5/73<br>Cele [2] 3/75<br>Cele [3] 6/73<br>Plac 2/70<br>No vomiting<br>reported | Mod/severe<br>abdom pain,<br>nausea,<br>dyspepsia:<br>Cele [1] 7/73<br>Cele [2] 3/75<br>Cele [3] 5/73<br>Plac 5/70                                                                                                                                                                           | Peripheral<br>oedema:<br>Cele [1] 1/73<br>Cele [2] 1/75<br>Cele [3] 0/73<br>Plac 0/70<br>No report of<br>hypertension, MI<br>or CHF                                                               | No clinically<br>important<br>laboratory<br>abnormalities<br>were noted                                                                                                                                                                                                                                                                                                                                                                                  | Cele [1] 3/73<br>Cele [2] 6/75<br>Cele [3] 7/73<br>Plac 2/70<br>No serious AEs<br>drug-related                                                                                                                                                                                                                                                                        |                                                                                                                                                                                                                        |                                                                                                             |                                                                                                          |
| <b>C-020</b><br>OA<br>12 weeks   | OA Knee/Hip (ACR) with flare<br>FCC 1-3<br>Assessment at baseline, 2, 6, 12 weeks<br>Washout 2-4 days<br>Double dummy method<br>Naprox<br>QS 5/5; VS 16/16                                                                                                       | Cele [1]<br>2x50mg/day (n=218)<br>Cele [2]<br>2x100mg/day (n=217)<br>Cele [3]<br>2x200mg/day (n=222)<br>Naprox<br>2x500mg/day (n=216)<br>Plac (n=219) | Cele [1] 92/218<br>Cele [2] 91/217<br>Cele [3] 79/222<br>Naprox 85/216<br>Plac 121/219 | Cele [1] 67/218<br>Cele [2] 44/217<br>Cele [3] 52/222<br>Naprox 55/216<br>Plac 87/219 | Cele [1] 19/218<br>Cele [2] 35/217<br>Cele [3] 23/222<br>Naprox 18/216<br>Plac 17/219<br>GI-related:<br>Cele [1] 3/218<br>Cele [2] 12/217<br>Cele [3] 7/222<br>Naprox 69/216<br>Plac 49/219<br>Cele [1] 12/218<br>Cele [2] 4/222<br>Naprox 3/216<br>Plac 4/219<br>Serious UGI:<br>Cele [1] 0/218<br>Cele [2] 0/217<br>Cele [3] 0/222<br>Naprox 14/216<br>Plac 14/219<br>Diarrhoea:<br>Cele [1] 12/218<br>Cele [2] 11/217<br>Cele [3] 15/222<br>Naprox 12/216<br>Plac 10/219<br>Vomiting:<br>Cele [1] 2/218<br>Cele [2] 4/217<br>Cele [3] 4/222<br>Naprox 2/216<br>Plac 1/219 | Any:<br>Cele [1] 150/218<br>Cele [2] 150/217<br>Cele [3] 144/222<br>Naprox 137/216<br>Plac 130/219<br>GI-related:<br>Cele [1] 61/218<br>Cele [2] 58/217<br>Cele [3] 54/222<br>Naprox 69/216<br>Plac 49/219<br>Cele [1] 12/218<br>Cele [2] 8/217<br>Cele [3] 7/222<br>Naprox 14/216<br>Plac 14/219<br>Diarrhoea:<br>Cele [1] 12/218<br>Cele [2] 11/217<br>Cele [3] 15/222<br>Naprox 12/216<br>Plac 10/219<br>Vomiting:<br>Cele [1] 2/218<br>Cele [2] 4/217<br>Cele [3] 4/222<br>Naprox 2/216<br>Plac 1/219                       | Duodenal ulcer:<br>Cele [1] 1/218<br>Cele [2] 0/217<br>Cele [3] 0/222<br>Naprox 0/216<br>Plac 0/219<br>GIH:<br>Cele [3] 19/222<br>Plac 0/219<br>Gastric ulcer:<br>Cele [1] 0/218<br>Plac 0/219                                                                                               | Mod/severe<br>abdom pain,<br>nausea,<br>dyspepsia:<br>Cele [1] 25/218<br>Cele [2] 16/217<br>Plac 0/219<br>GIH:<br>Cele [3] 19/222<br>Plac 0/219<br>Gastric ulcer:<br>Cele [1] 0/218<br>Plac 0/219 | Generalised<br>Oedema:<br>Cele [1] 1/218<br>Cele [2] 1/217<br>Cele [3] 1/222<br>Naprox 0/216<br>Plac 2/219<br>Aggravated<br>hypertension:<br>Cele [1] 0/218<br>Cele [2] 2/217<br>Cele [3] 4/222<br>Naprox 0/216<br>Plac 1/219<br>MI:<br>Cele [1] 0/218<br>Cele [2] 0/217<br>Cele [3] 3/222<br>Naprox 0/216<br>Plac 0/219<br>Cardiac Failure:<br>Cele [1] 1/218<br>Cele [2] 0/217<br>Cele [3] 0/222<br>Naprox 0/216<br>Plac 0/219                         | Hypertension:<br>Cele [1] 1/218<br>Cele [2] 3/217<br>Cele [3] 1/222<br>Naprox 0/216<br>Plac 2/219<br>Aggravated<br>hypertension:<br>Cele [1] 0/218<br>Cele [2] 2/217<br>Cele [3] 4/222<br>Naprox 0/216<br>Plac 1/219<br>MI:<br>Cele [1] 0/218<br>Cele [2] 0/217<br>Cele [3] 3/222<br>Naprox 0/216<br>Plac 0/219                                                       | Hct >5%<br>decrease:<br>Cele [1] 11/218<br>Cele [2] 13/217<br>Cele [3] 34/222<br>Naprox 25/216<br>Plac 21/219<br>No other<br>clinically relevant<br>lab results seen<br>in more than 2%<br>of patients in any<br>group | Cele [1] 17/218<br>Cele [2] 21/217<br>Cele [3] 17/222<br>Naprox 15/216<br>Plac 12/219                       |                                                                                                          |

|              |                                                                                                                                                                     |                                                                                                                                                                               |                                                                             |                                                                            |                                                                                                                                                                                                                                  |                                                                                                                                                                                                                                                                                                                                                                                                                |                                                                                                                                                                                                                                                                                                                                          |                                                                                                                |                                                                                                                                                                           |                                                                                 |                                                                                  |                                                                                                                                                                     |                                                                           |
|--------------|---------------------------------------------------------------------------------------------------------------------------------------------------------------------|-------------------------------------------------------------------------------------------------------------------------------------------------------------------------------|-----------------------------------------------------------------------------|----------------------------------------------------------------------------|----------------------------------------------------------------------------------------------------------------------------------------------------------------------------------------------------------------------------------|----------------------------------------------------------------------------------------------------------------------------------------------------------------------------------------------------------------------------------------------------------------------------------------------------------------------------------------------------------------------------------------------------------------|------------------------------------------------------------------------------------------------------------------------------------------------------------------------------------------------------------------------------------------------------------------------------------------------------------------------------------------|----------------------------------------------------------------------------------------------------------------|---------------------------------------------------------------------------------------------------------------------------------------------------------------------------|---------------------------------------------------------------------------------|----------------------------------------------------------------------------------|---------------------------------------------------------------------------------------------------------------------------------------------------------------------|---------------------------------------------------------------------------|
| <b>C-021</b> | OA Knee/Hip (ACR), with flare FCC 1-3 Assessment at baseline, 2, 6, 12 weeks Endoscopy at baseline, 12 weeks Washout 2-14 days Double dummy method QS 5/5; VS 16/16 | Cele [1] 16/258 Cele [2] 75/240 Cele [3] 79/237 Cele [2] 2x50mg/day (n=258) Cele [2] 2x100mg/day (n=239) Cele [3] 2x200mg/day (n=237) Naprox 2x500mg/day (n=233) Plac (n=247) | Cele [1] 86/258 Cele [2] 75/240 Cele [3] 79/237 Naprox 81/233 Plac 127/247  | Cele [1] 58/258 Cele [2] 51/239 Cele [3] 49/237 Naprox 41/233 Plac 92/247  | Cele [1] 16/258 Cele [2] 16/239 Cele [3] 23/237 Naprox 0/233 Plac 14/247 GI-related: Cele [1] 17/258 Cele [2] 10/239 Cele [3] 8/237 Naprox 18/233 Plac 5/247                                                                     | Any: Cele [1] 164/258 Cele [2] 157/239 Cele [3] 161/237 Cele [1] 14/247 GI-related: Cele [1] 17/258 Cele [2] 62/239 Cele [3] 74/237 Naprox 39/233 Plac 72/247 Serious: Cele [1] 1/258 Cele [2] 4/239 Cele [3] 7/237 Naprox 7/233 Plac 5/247 Serious UGI: Cele [1] 1/258 Cele [2] 2/239 Cele [3] 1/237 Naprox 1/233 Plac 1/247 Serious CV: Cele [1] 0/258 Cele [2] 2/239 Cele [3] 3/237 Naprox 1/233 Plac 3/247 | Dyspepsia: Cele [1] 24/258 Cele [2] 20/239 Cele [3] 29/237 Cele [1] 15/258 Cele [2] 11/239 Cele [3] 14/237 Naprox 18/233 Plac 9/247                                                                                                                                                                                                      | Duodenal ulcer: Cele [1] 0/258 Cele [2] 0/239 Cele [3] 0/237 Naprox 2/233 Plac 0/247                           | Mod/severe abdominal pain, nausea, dyspepsia: Cele [1] 13/258 Cele [2] 18/239 Cele [3] 30/237                                                                             | Facial oedema: Cele [1] 0/258 Cele [2] 1/239 Cele [3] 1/237                     | Cardiac Failure: Cele [1] 0/258 Cele [2] 0/239 Cele [3] 1/237                    | Hct $\geq$ 5% decrease: Cele [1] 23/258 Cele [2] 16/239 Cele [3] 21/237                                                                                             | Cele [1] 23/258 Cele [2] 16/239 Cele [3] 21/237 Naprox 27/233 Plac 14/247 |
| <b>C-042</b> | Symptomatic OA Hip/knee (ACR) at least 6 months, requiring NSAID FCC 1-3 Washout 2-5 days Assessment baseline, 2, 4, 6 weeks Double dummy method QS 5/5; VS 16/16   | Cele 200mg/day (n=348) Diclo 100mg/day (n=341) FCC 1-3 Washout 2-5 days Assessment baseline, 2, 4, 6 weeks Double dummy method QS 5/5; VS 16/16                               | Cele 31/349 Diclo 40/341                                                    | Cele 4/346 Diclo 3/341                                                     | Cele 22/346 Diclo 29/341 GI-related: Cele 8/346 Diclo 16/341 Serious: Cele 3/346 Diclo 4/341 Serious UGI: None Serious CV: Cele 1/346 Diclo 1/341                                                                                | Any: Cele 150/346 Diclo 180/341 GI-related: Cele 59/346 Diclo 30/341 Serious: Cele 3/346 Diclo 4/341 Serious UGI: None Serious CV: Cele 1/346 Diclo 1/341                                                                                                                                                                                                                                                      | Dyspepsia: Cele 11/346 Diclo 23/341 Abdom pain: Cele 17/346 Diclo 23/341 Nausea: Cele 11/346 Diclo 17/341 Diarrhoea: Cele 22/346 Diclo 26/341 Vomiting: Cele 4/346 Diclo 3/341                                                                                                                                                           | Mod/severe abdominal pain, nausea, dyspepsia: Cele 11/346 Diclo 30/341                                         | Generalised oedema: Cele 1/346 Diclo 0/341 Peripheral oedema: Cele 7/346 Diclo 8/341 Hypertension: Cele 3/346 Diclo 0/341 Aggravated Hypertension: Cele 0/346 Diclo 4/341 | No clinically important laboratory abnormalities were noted                     | Cele 47/346 Diclo 62/341                                                         |                                                                                                                                                                     |                                                                           |
| <b>C-047</b> | OA Knee (ACR) with flare FCC 1-3 Washout NSAID 2 days, other 5 half-lives Assessment at baseline, 2, 4 weeks QS 5/5; VS 16/16                                       | Cele [1] 50mg/day (n=100) Cele [2] 200mg/day (n=101) Cele [3] 800mg/day (n=99) Plac (n=101)                                                                                   | Cele [1] 24/100 Cele [2] 22/101 Cele [3] 23/99 Plac 31/101                  | Cele [1] 15/100 Cele [2] 13/101 Cele [3] 10/99 Plac 23/101                 | Cele [1] 5/100 Cele [2] 4/101 Cele [3] 10/99 Plac 5/101 GI-related: Cele [1] 0/100 Cele [2] 1/101 Cele [3] 2/99 Plac 0/101                                                                                                       | Any: Cele [1] 61/100 Cele [2] 59/101 Cele [3] 56/99 Plac 5/101 GI-related: Cele [1] 0/100 Cele [2] 23/101 Cele [3] 19/99 Plac 9/101 Serious: Cele [1] 1/100 Cele [2] 2/101 Cele [3] 1/99 Plac 1/101 Serious UGI: Cele [1] 1/100 Cele [2] 0/101 Cele [3] 0/99 Plac 0/101 Serious CV: Cele [2] 1/101 Remaining =0                                                                                                | Dyspepsia: Cele [1] 8/100 Cele [2] 9/101 Cele [3] 10/99 Plac 1/101 Abdom pain: Cele [1] 1/100 Cele [2] 0/101 Cele [3] 3/99 Plac 1/101 Nausea: Cele [1] 0/100 Cele [2] 5/101 Cele [3] 3/99 Plac 0/101 Diarrhoea: Cele [1] 10/100 Cele [2] 5/101 Cele [3] 3/99 Plac 2/101 Vomiting: Cele [1] 0/100 Cele [2] 1/101 Cele [3] 2/99 Plac 0/101 | Mod/severe abdominal pain, nausea, dyspepsia: Cele [1] 3/100 Cele [2] 7/101 Cele [3] 4/99 Plac 1/101           | Peripheral Oedema: Cele [1] 2/100 Cele [2] 1/101 Cele [3] 2/99 Plac 3/101 Aggravated hypertension: Cele [1] 0/100 Cele [2] 0/101 Cele [3] 2/99 Plac 0/101                 | No clinically important laboratory abnormalities were noted                     | Cele [1] 1/100 Cele [2] 4/101 Cele [3] 12/99 Plac 3/101                          |                                                                                                                                                                     |                                                                           |
| <b>C-054</b> | OA Hip (ACR) with flare FCC 1-3 Washout 2-4 days Assessment at baseline, 2, 6, 12 weeks Double dummy method QS 5/5; VS 16/16                                        | Cele [1] 100mg/day (n=216) Cele [2] 200mg/day (n=213) Cele [3] 400mg/day (n=213) Naprox 1000mg/day (n=207) Plac (n=217)                                                       | Cele [1] 105/216 Cele [2] 96/207 Cele [3] 94/213 Naprox 89/207 Plac 138/217 | Cele [1] 76/216 Cele [2] 61/207 Cele [3] 55/213 Naprox 51/207 Plac 113/217 | Cele [1] 17/216 Cele [2] 27/207 Cele [3] 25/213 Naprox 29/207 Plac 16/217 GI-related: Cele [1] 6/216 Cele [2] 7/207 Cele [3] 11/213 Naprox 17/207 Plac 6/217                                                                     | Any: Cele [1] 125/216 Cele [2] 136/207 Cele [3] 131/213 Cele [1] 36/216 Cele [2] 39/207 Cele [3] 63/213 Naprox 73 Placbo 39/217 Serious: Cele [1] 3/216 Cele [2] 2/207 Cele [3] 3/213 Naprox 3/207 Plac 7/217 Serious UGI: Cele [1] 1/216 Cele [2] 1/207 Cele [3] 1/213 Naprox 1/207 Plac 3/217                                                                                                                | Dyspepsia: Cele [1] 8/216 Cele [2] 18/207 Cele [3] 21/213 Cele [1] 11/216 Cele [2] 10/213 Cele [3] 12/213 Placbo 39/217 Nausea: Cele [1] 8/216 Cele [2] 8/207 Cele [3] 12/213 Naprox 12/207 Placbo 52/217 Diarrhoea: Cele [1] 8/216 Cele [2] 13/207 Cele [3] 21/213 Naprox 11/207 Plac 12/217                                            | Vomiting: Cele [1] 2/216 Cele [2] 3/213 Cele [3] 3/213 Cele [1] 0/216 Cele [2] 0/207 Cele [3] 0/213 Plac 0/217 | Mod/severe abdominal pain, nausea, dyspepsia: Cele [1] 10/216 Cele [2] 13/207 Cele [3] 16/213 Naprox 20/207 Plac 10/217                                                   | Generalised oedema: Cele [1] 0/216 Cele [2] 0/207 Cele [3] 1/213 Plac 0/217     | Aggravated hypertension: Cele [1] 0/216 Cele [2] 1/207 Cele [3] 1/213 Plac 0/207 | Hct $\geq$ 5% decrease: Cele [1] 20/216 Cele [2] 9/213 Cele [3] 2/207 Plac 14/217 Hb $\geq$ 20g/L decrease: Cele [1] 2/216 Cele [2] 0/207 Cele [3] 2/213 Plac 4/207 | Any: Cele [1] 11/216 Cele [2] 20/207 Cele [3] 17/213 Plac 9/217           |
| <b>C-060</b> | OA Knee (ACR) with flare FCC 1-3 Washout NSAID 2 days, other 5 half-lives Assessment at baseline, 2, 6 weeks Double dummy method QS 5/5; VS 16/16                   | Cele [1] 2x100mg/day (n=231) Cele [2] 1x200mg/day (n=222) Plac (n=231)                                                                                                        | Cele [1] 37/231 Cele [2] 40/222 Plac 85/231                                 | Cele [1] 18/231 Cele [2] 21/222 Plac 56/231                                | Cele [1] 11/231 Cele [2] 9/222 Plac 20/231 GI-related: Cele [1] 4/231 Cele [2] 3/222 Plac 9/231 Serious: Cele [1] 4/231 Cele [2] 0/222 Cele [3] 1/213 Naprox 1/207 Plac 3/217                                                    | Any: Cele [1] 122/231 Cele [2] 111/222 Plac 120/231 GI-related: Cele [1] 40/231 Cele [2] 37/222 Plac 32/231 Serious: Cele [1] 4/231 Cele [2] 0/222 Cele [3] 1/213 Naprox 1/207 Plac 3/217                                                                                                                                                                                                                      | Dyspepsia: Cele [1] 18/231 Cele [2] 12/222 Plac 10/231 Abdom pain: Cele [1] 4/231 Cele [2] 0/232 Placbo 7/231 Nausea: Cele [1] 5/231 Cele [2] 4/222 Placbo 12/231 Diarrhoea: Cele [1] 6/231 Cele [2] 10/222 Placbo 12/231 Vomiting: Cele [1] 1/231 Cele [2] 0/222 Placbo 1/231                                                           | Mod/severe abdominal pain, nausea, dyspepsia: Cele [1] 4/231 Cele [2] 4/222 Plac 15/231                        | Peripheral oedema: Cele [1] 1/231 Cele [2] 0/222 Plac 0/231                                                                                                               | Hct $\geq$ 5% decrease: Cele [1] 13/231 Cele [2] 21/222 Plac 11/231             | Any: Cele [1] 8/231 Cele [2] 12/222 Plac 11/231                                  |                                                                                                                                                                     |                                                                           |
| <b>C-087</b> | OA Knee (ACR) flare FCC 1-3 Washout 2 days for NSAID Assessed at baseline, 2, 6 weeks Double dummy method QS 5/5; VS 16/16                                          | Cele [1] 2x100mg/day (n=241) Cele [2] 1x200mg/day (n=231) Plac (n=243)                                                                                                        | Cele [1] 47/243 Cele [2] 40/231 Plac 79/243                                 | Cele [1] 27/241 Cele [2] 24/231 Plac 55/243                                | Cele [1] 9/241 Cele [2] 6/231 Plac 12/243 GI-related: Cele [1] 3/241 Cele [2] 0/231 Plac 3/243 Serious: Cele [1] 0/241 Cele [2] 2/231 Plac 1/243 Serious UGI: None reported Serious CV: Cele [1] 0/241 Cele [2] 1/231 Plac 0/243 | Any: Cele [1] 119/241 Cele [2] 124/231 Plac 116/243 GI-related: Cele [1] 49/241 Cele [2] 34/231 Plac 32/243 Serious: Cele [1] 0/241 Cele [2] 2/231 Plac 1/243 Serious UGI: None reported Serious CV: Cele [1] 0/241 Cele [2] 1/231 Plac 0/243                                                                                                                                                                  | Dyspepsia: Cele [1] 15/241 Cele [2] 9/231 Plac 12/243 Abdom Pain: Cele [1] 5/241 Cele [2] 2/231 Placbo 7/231 Nausea: Cele [1] 6/241 Cele [2] 7/231 Plac 7/231 Diarrhoea: Cele [1] 12/241 Cele [2] 7/231 Plac 3/243 Vomiting: Cele [1] 1/241 Cele [2] 1/231 Plac 1/243                                                                    | Mod/severe abdominal pain, nausea, dyspepsia: Cele [1] 9/241 Cele [2] 11/231 Plac 9/243                        | Peripheral oedema: Cele [1] 6/241 Cele [2] 6/231 Plac 2/243                                                                                                               | Hct $\geq$ 5% decrease: Cele [1] 3/241 Cele [2] 0/231 Cele [3] 4/231 Plac 1/243 | Any: Cele [1] 7/241 Cele [2] 12/231 Plac 11/243                                  |                                                                                                                                                                     |                                                                           |

|                          |                                                                                                                                                                                                                                                        |                                                                                                                           |                                                                            |                                                                          |                                                                                                                                                                                                                                                                                                                                                         |                                                                                                                                                                                                                                                                                                                                                                 |                                                                                                                                                                                                                                                                                                                                                                                                                                                                 |                                                                                                                                                                                                                                                                                                                                  |                                                                                                                                                                                                                                                                                                                                                                                                                                                                      |                                                                                                                                                                                                                                                                                                                                                                                                                                                                                  |                                                                                                                                                                                                                                                                                                                                                                        |                                                                                                                                                                                                                                                                 |                                                                            |
|--------------------------|--------------------------------------------------------------------------------------------------------------------------------------------------------------------------------------------------------------------------------------------------------|---------------------------------------------------------------------------------------------------------------------------|----------------------------------------------------------------------------|--------------------------------------------------------------------------|---------------------------------------------------------------------------------------------------------------------------------------------------------------------------------------------------------------------------------------------------------------------------------------------------------------------------------------------------------|-----------------------------------------------------------------------------------------------------------------------------------------------------------------------------------------------------------------------------------------------------------------------------------------------------------------------------------------------------------------|-----------------------------------------------------------------------------------------------------------------------------------------------------------------------------------------------------------------------------------------------------------------------------------------------------------------------------------------------------------------------------------------------------------------------------------------------------------------|----------------------------------------------------------------------------------------------------------------------------------------------------------------------------------------------------------------------------------------------------------------------------------------------------------------------------------|----------------------------------------------------------------------------------------------------------------------------------------------------------------------------------------------------------------------------------------------------------------------------------------------------------------------------------------------------------------------------------------------------------------------------------------------------------------------|----------------------------------------------------------------------------------------------------------------------------------------------------------------------------------------------------------------------------------------------------------------------------------------------------------------------------------------------------------------------------------------------------------------------------------------------------------------------------------|------------------------------------------------------------------------------------------------------------------------------------------------------------------------------------------------------------------------------------------------------------------------------------------------------------------------------------------------------------------------|-----------------------------------------------------------------------------------------------------------------------------------------------------------------------------------------------------------------------------------------------------------------|----------------------------------------------------------------------------|
| <b>C-096</b><br>12 weeks | OA (ACR) hip/knee/hand ≥6 months, requiring NSAID/analgesic, FCC 1-3<br>Double dummy method<br>Assessed baseline, 6, 12 weeks<br>AEs assessed by investigator<br>examination and question and patient reported and laboratory test<br>OS 5/5; VS 16/16 | Cele [1] 2x100mg/day (n=4393)<br>Cele [2] 2x200mg/day (n=4407)<br>Naprox 2x500mg/day (n=905)<br>Diclo 2x50mg/day (n=3489) | Cele [1] 864/4393<br>Cele [2] 867/4407<br>Naprox 322/905<br>Diclo 530/3489 | Cele [1] 240/4393<br>Cele [2] 177/4407<br>Naprox 79/905<br>Diclo 97/3489 | Cele [1] 364/4393<br>Cele [2] 445/4407<br>Naprox 177/905<br>Diclo 274/3489                                                                                                                                                                                                                                                                              | Any AE:<br>Cele [1] 1601/4393<br>Cele [2] 1673/4407<br>Diclo 1257/3489<br>GI-related:<br>Cele [1] 206/4393<br>Cele [2] 254/4407<br>Naprox 134/905<br>Diclo 163/3489                                                                                                                                                                                             | Dyspepsia:<br>Cele [1] 1884/4393<br>Cele [2] 2344/4407<br>Diclo 1623/3489<br>Naprox 97/905<br>Abdom Pain:<br>Cele [1] 203/4393<br>Cele [2] 220/4407<br>Diclo 193/3489<br>Naprox 81/905<br>Nausea:<br>Cele [1] 100/4393<br>Cele [2] 107/4407<br>Diclo 82/3489<br>Naprox 69/905<br>Diarrhoea:<br>Cele [1] 148/4393<br>Cele [2] 159/4407<br>Diclo 117/3489<br>Naprox 47/905<br>Vomiting:<br>Cele [1] 25/4393<br>Cele [2] 22/4407<br>Diclo 29/3489<br>Naprox 22/905 | GIH:<br>Cele [1] 2/4393<br>Cele [2] 1/4407<br>Diclo 1/3489<br>Naprox 1/905<br>Gastric ulcer:<br>Cele [1] 1/4393<br>Cele [2] 1/4407<br>Gastric ulcer haemorrhagic:<br>Cele [1] 0/4393<br>Cele [2] 2/4407<br>Diclo 1/3489<br>Naprox 2/905<br>Duodenal ulcer:<br>Cele [1] 1/4393<br>Cele [2] 0/4407<br>Diclo 0/3489<br>Naprox 0/905 | Mod/severe<br>abdom pain, nausea,<br>dyspepsia:<br>Cele [1] 209/4393<br>Cele [2] 225/4407<br>Diclo 200/3489<br>Naprox 130/905                                                                                                                                                                                                                                                                                                                                        | Generalised<br>oedema:<br>Cele [1] 33/4393<br>Cele [2] 9/4407<br>Diclo 8/3489<br>Naprox 8/905<br>Peripheral<br>oedema:<br>Cele [1] 69/4393<br>Cele [2] 80/4407<br>Diclo 28/3489<br>Naprox 35/905<br>Facial oedema:<br>Cele [1] 10/4393<br>Cele [2] 11/4407<br>Diclo 8/3489<br>Naprox 1/905                                                                                                                                                                                       | Hypertension:<br>Cele [1] 41/4393<br>Cele [2] 53/4407<br>Diclo 44/3489<br>Naprox 11/905<br>Aggravated<br>hypertension:<br>Cele [1] 10/4393<br>Cele [2] 15/4407<br>Diclo 10/3489<br>Naprox 2/905<br>Cardiac Failure:<br>Cele [1] 2/4393<br>Cele [2] 2/4407<br>Diclo 7/3489<br>Naprox 2/905<br>MI:<br>Cele [1] 8/4393<br>Cele [2] 2/4407<br>Diclo 0/3489<br>Naprox 1/905 | Hb ≥20g/L<br>decrease:<br>Cele [1+2] 638/4407<br>Diclo+Naprox 31/2613<br>Hct ≥10%<br>reduction:<br>Cele [1+2] 8/6943<br>Diclo+Naprox 137/436<br>Creatinine<br>≥1.3xULN:<br>Cele [1+2] 12/701<br>Diclo+Naprox (not all patients had haematological measurements) | Cele [1] 574/4393<br>Cele [2] 638/4407<br>Diclo 532/3489<br>Naprox 218/905 |
| <b>C-118</b><br>6 weeks  | OA knee (ACR) with flare, FCC 1-3<br>Washout 2 days for NSAIDs, other 5 half-lives<br>Assessed at baseline, 2, 6 weeks<br>OS 5/5; VS 16/16                                                                                                             | Cele 2x100mg/day (n=199)<br>Diclo 3x50mg/day (n=199)<br>Plac (n=200)                                                      | Cele 40/199<br>Diclo 37/199<br>Plac 71/200                                 | Cele 18/199<br>Diclo 10/199<br>Plac 42/200                               | Cele 14/199<br>Diclo 22/199<br>Plac 14/200                                                                                                                                                                                                                                                                                                              | Any:<br>Cele 99/199<br>Diclo 107/199<br>Plac 99/200<br>GI-related:<br>Cele 35/199<br>Diclo 49/199<br>Plac 38/200<br>Serious:<br>Cele 0/199<br>Diclo 4/199<br>Plac 1/200<br>GI-related:<br>Cele 0/199<br>Diclo 0/199<br>Plac 1/200<br>Serious CV:<br>Cele 0/199<br>Diclo 2/199<br>Plac 0/200                                                                     | Dyspepsia:<br>Cele 11/199<br>Diclo 15/199<br>Plac 12/200<br>Abdom pain:<br>Cele 7/199<br>Diclo 14/199<br>Plac 8/200<br>Nausea:<br>Cele 4/199<br>Diclo 7/199<br>Plac 6/200<br>Diarrhoea:<br>Cele 9/199<br>Diclo 13/199<br>Plac 10/200<br>Vomiting:<br>Cele 1/199<br>Diclo 2/199<br>Plac 0/200                                                                                                                                                                    | Gastric ulcer:<br>Cele 0/199<br>Diclo 1/199<br>Plac 0/200                                                                                                                                                                                                                                                                        | Mod/severe<br>dyspepsia,<br>abdom pain,<br>nausea,<br>dyspepsia:<br>Cele 10/199<br>Diclo 13/199<br>Plac 10/200                                                                                                                                                                                                                                                                                                                                                       | Generalised<br>oedema:<br>Cele 0/199<br>Diclo 1/199<br>Diclo 0/200<br>Peripheral<br>oedema:<br>Cele 10/199<br>Diclo 5/199<br>Placebo 1/200<br>Hypertension:<br>Cele 1/199<br>Diclo 2/199<br>Placebo 0/200<br>Aggravated<br>hypertension:<br>Cele 0/199<br>Diclo 2/199<br>Placebo 1/200                                                                                                                                                                                           | No report of MI or CHF                                                                                                                                                                                                                                                                                                                                                 | Hct ≥5%<br>decrease:<br>Cele 15/199<br>Diclo 23/199<br>Plac 17/200<br>Hb ≥20g/L<br>decrease:<br>Cele 1/199<br>Diclo 2/199<br>Plac 1/200<br>Creatinine<br>≥1.3xULN:<br>Cele 1/199<br>Diclo 1/199<br>Placebo 1/200                                                | Any:<br>Cele 16/199<br>Diclo 24/199<br>Plac 19/200                         |
| <b>C-149</b><br>6 weeks  | OA Hand/Knee/Hip (ACR), requiring NSAID and/or analgesic, with treated stable hypertension<br>FCC 1-3<br>Washout 4 days<br>Double dummy method<br>Assessment baseline, 1, 2, 6 weeks<br>OS 5/5; VS 16/16                                               | Cele 1x200mg/day (n=411)<br>Role 1x25mg/day (n=399)                                                                       | Cele 64/411<br>Role 51/399                                                 | Cele 8/411<br>Role 4/399                                                 | All:<br>Cele 37/411<br>Role 36/399<br>GI-related:<br>Cele 11/411 (1 GI Bleed)<br>GI Bleed)<br>Role 10/399<br>GI related:<br>Cele 67/411<br>Role 86/399<br>Serious UGI:<br>Cele 2/411<br>Role 0/399<br>Possible others<br>Any "renal event" (defined):<br>Cele 123/411<br>Role 162/399<br>Composite renal event (defined):<br>Cele 47/411<br>Role 72/399 | Excluding renal<br>Any:<br>Cele 237/411<br>Role 245/399<br>All Serious<br>Cele 11/411 (1 GI Bleed)<br>Role 10/399<br>GI related:<br>Cele 67/411<br>Role 86/399<br>Serious UGI:<br>Cele 2/411<br>Role 0/399<br>Possible others<br>Any "renal event" (defined):<br>Cele 123/411<br>Role 162/399<br>Composite renal event (defined):<br>Cele 47/411<br>Role 72/399 | Dyspepsia:<br>Cele 21/411<br>Role 29/399<br>Diarrhoea:<br>Cele 17/411<br>Role 22/399<br>Abdom Pain:<br>Cele 13/411<br>Role 20/399<br>Nausea:<br>Cele 8/411<br>Role 11/399<br>Possible others<br>frequency ≤2%                                                                                                                                                                                                                                                   | Mod/severe<br>abdom pain, nausea,<br>dyspepsia:<br>Cele 13/411<br>Role 26/399                                                                                                                                                                                                                                                    | Defined cardio-renal events:<br>Cele 23/411<br>Role 26/399<br>Significant<br>oedema:<br>Cele 20/411<br>Role 38/399<br>Aggravated<br>hypertension:<br>Cele 23/411<br>Role 32/399<br>Composite renal events:<br>Cele 47/411<br>Role 72/399<br>Secondary outcomes:<br>Cele 123/411<br>Role 162/399<br>New/worsening oedema:<br>Cele 78/411<br>Role 114/399<br>Elevated<br>hypertension:<br>Cele 58/411<br>Role 79/399<br>New/worsening CHF:<br>Cele 9/411<br>Role 4/399 | Lab result:<br>Cele 6/411<br>Role 6/399<br>Any renal event:<br>Cele 123/411<br>Role 162/399<br>Hb ≥20g/L:<br>Cele 0/411<br>Role 1/399<br>Not meeting<br>above definitions:<br>Peripheral<br>oedema:<br>Cele 5/411<br>Role 10/399<br>Hypertension:<br>Cele 1/411<br>Role 0/399<br>Aggravated<br>hypertension:<br>Cele 1/411<br>Role 0/399<br>Cardiac Failure:<br>Cele 0/411<br>Role 1/399<br>MI:<br>Cele 1/411<br>Role 0/399<br>No clin relevant<br>creatinine values<br>reported | Lab test = renal<br>event:<br>Cele 6/411<br>Role 6/399<br>Hb ≥20g/L:<br>Cele 0/411<br>Role 1/399<br>Hot ≥5%<br>decrease:<br>Cele 59/411<br>Role 76/399<br>No clin relevant<br>creatinine values<br>reported                                                                                                                                                            | Cele 27/411<br>Role 36/399                                                                                                                                                                                                                                      |                                                                            |
| <b>C-152</b><br>6 weeks  | OA Knee (ACR) with flare, requiring NSAID ± analgesic, FCC 1-3<br>Washout ≥2days<br>Double dummy method<br>Assessed at baseline, 3, 6 weeks<br>OS 5/5; VS 16/16                                                                                        | Cele 1x200mg/day (n=63)<br>Role 1x25mg/day (n=59)<br>Plac (n=60)                                                          | Cele 14/63<br>Role 10/59<br>Plac 16/60                                     | Cele 5/63<br>Role 2/59<br>Plac 12/60                                     | All:<br>Cele 4/63<br>Role 4/59<br>Plac 1/60<br>GI Related:<br>Cele 1/63<br>Role 4/59<br>Plac 0/60                                                                                                                                                                                                                                                       | Any AE:<br>Cele 31/63<br>Role 36/59<br>Plac 2/60<br>GI-related:<br>Cele 7/63<br>Role 20/59<br>Plac 6/60<br>Serious:<br>Cele 1/63<br>Role 0/59<br>Plac 0/60<br>None                                                                                                                                                                                              | Dyspepsia:<br>Cele 2/63<br>Role 6/59<br>Plac 4/60<br>Abdom Pain:<br>Cele 1/63<br>Role 6/59<br>Plac 0/60<br>Nausea:<br>Cele 1/63<br>Role 1/59<br>Plac 0/60<br>Diarrhoea:<br>Cele 3/63<br>Role 4/59<br>Plac 0/60<br>Vomiting:<br>Cele 1/63<br>Role 0/59<br>Plac 0/60                                                                                                                                                                                              | Mod/severe<br>abdom pain, nausea,<br>dyspepsia:<br>Cele 3/63<br>Role 5/59<br>Plac 0/60                                                                                                                                                                                                                                           | Peripheral<br>oedema:<br>Cele 2/63<br>Role 0/59<br>Plac 0/60<br>Aggravated<br>hypertension:<br>Cele 1/63<br>Role 1/59<br>Plac 1/60                                                                                                                                                                                                                                                                                                                                   | No report of MI or CHF                                                                                                                                                                                                                                                                                                                                                                                                                                                           | Hb ≥10g/L:<br>Cele 3/63<br>Role 5/59<br>Plac 0/60<br>Creatinine<br>≥1.3xULN:<br>None<br>Ht ≥5%<br>decrease:<br>Cele 0/63<br>Plac 0/60<br>No withdrawals<br>due to lab test<br>results                                                                                                                                                                                  | All AEs:<br>Cele 4/63<br>Role 6/59<br>Plac 0/60<br>No serious<br>adverse event<br>related to study<br>medication                                                                                                                                                |                                                                            |
| <b>C-181</b><br>6 weeks  | OA (ACR) Hand/Knee/Hip, requiring NSAID or analgesic, with stable treated hypertension<br>FCC 1-3<br>Washout 4 days<br>Double dummy method<br>Assessed at baseline, 1, 2, 6 weeks<br>OS 5/5; VS 16/16                                                  | Cele 1x200mg/day (n=549)<br>Role 1x25mg/day (n=543)                                                                       | Cele 51/549<br>Role 53/543                                                 | Cele 4/549<br>Role 3/543                                                 | All:<br>Cele 26/549<br>Role 27/543<br>GI Related:<br>Cele 11/549<br>Role 15/543<br>Cardio renal:<br>Cele 8/549<br>Role 12/543                                                                                                                                                                                                                           | Excluding cardio-renal<br>Any AE:<br>Cele 251/549<br>Role 248/543<br>Serious:<br>Cele 12/549<br>Role 11/543<br>Cardiac failure 3)<br>GI-related:<br>Cele 83/549<br>Role 83/543<br>Cele 3/549 (Bleeds)<br>Role 1/543 (Perforation)                                                                                                                               | Dyspepsia:<br>Cele 24/549<br>Role 19/543<br>Abdom Pain:<br>Cele 14/549<br>Role 22/543<br>Diarrhoea:<br>Cele 21/549<br>Role 17/543<br>Any others<br>occurred at<br>frequency <2%                                                                                                                                                                                                                                                                                 | Mod/severe<br>abdom pain, nausea,<br>dyspepsia:<br>Role 9/543                                                                                                                                                                                                                                                                    | Defined cardio-renal events:<br>Cele 7/549<br>Role 12/543<br>Systolic BP:<br>Cele 6.9%<br>Role 14.9%<br>Oedema:<br>Cele 101/549<br>Role 136/543<br>Cardiac Failure:<br>Cele 2/549<br>Role 3/543                                                                                                                                                                                                                                                                      | Not meeting<br>above definitions:<br>Oedema:<br>Cele 26/549<br>Role 18/543                                                                                                                                                                                                                                                                                                                                                                                                       | Data not<br>available                                                                                                                                                                                                                                                                                                                                                  | Data not<br>available                                                                                                                                                                                                                                           |                                                                            |
| <b>C-209</b><br>6 weeks  | OA (ACR) knee with flare, requiring daily therapy, FCC 1-3<br>Double dummy method<br>Assessed at baseline, 2, 6 weeks<br>AEs observed or patient reported and laboratory tests<br>OS 5/5; VS 16/16                                                     | Cele 1x200mg/day (n=125)<br>Naprox 2x500mg/day (n=66)                                                                     | Cele 23/125<br>Naprox 18/125<br>Plac 22/66                                 | Cele 2/125<br>Naprox 2/125<br>Plac 0/66                                  | Cele 7/125<br>Naprox 7/125<br>Placebo 2/66                                                                                                                                                                                                                                                                                                              | Any AE:<br>Cele 52/125<br>Naprox 51/125<br>Plac 35/66<br>GI-related:<br>Cele 2/125<br>Naprox 6/125<br>Plac 4/66<br>Serious:<br>Cele 1/125<br>Naprox 1/125<br>Plac 0/66<br>Serious UGI:<br>Cele 0/125<br>Naprox 0/125<br>Plac 0/66                                                                                                                               | Dyspepsia:<br>Cele 11/125<br>Naprox 41/125<br>Plac 3/66<br>Abdom Pain:<br>Cele 11/125<br>Naprox 3/125<br>Plac 3/66<br>Nausea:<br>Cele 2/125<br>Naprox 3/125<br>Plac 2/66<br>Diarrhoea:<br>Cele 3/125<br>Naprox 2/125<br>Plac 1/66                                                                                                                                                                                                                               | Vomiting:<br>≤2% in any<br>group                                                                                                                                                                                                                                                                                                 | Mod/severe<br>abdom pain, nausea,<br>dyspepsia:<br>Cele 0/125<br>Naprox 6/125<br>Plac 4/66                                                                                                                                                                                                                                                                                                                                                                           | oedema and<br>hypertension:<br>≤2% in any group                                                                                                                                                                                                                                                                                                                                                                                                                                  | Some "abnormal<br>results" for Hb,<br>Ht and creatinine<br>due to lab test<br>(Naprox)                                                                                                                                                                                                                                                                                 | Cele 32/125<br>Naprox 42/125<br>Plac 27/66<br>2 serious AEs<br>were not<br>treatment related                                                                                                                                                                    |                                                                            |

|                                             |                                                                                                                                                                                                                                                                                          |                                                                                                                                                           |                                                                                                            |                                                                                                                |                                                                                                                                                      |                                                                                                                                                                                                                                                                                                                                                                                                                                                                                                                 |                                                                                                                                                                                                                                                                                                                                                                                                                   |                                                                                                                                                                                                                                                                                           |                                                                                                                                                                                                                                                                         |                                                                                                                                                                                                                                                                                                                                                                                                          |                                                                                                                                                                                                                                                                                                                                                                                                                                                                                                |                                                                                                                                                                                                                                                                                                                                                        |                                                                                                                                                                                                                         |
|---------------------------------------------|------------------------------------------------------------------------------------------------------------------------------------------------------------------------------------------------------------------------------------------------------------------------------------------|-----------------------------------------------------------------------------------------------------------------------------------------------------------|------------------------------------------------------------------------------------------------------------|----------------------------------------------------------------------------------------------------------------|------------------------------------------------------------------------------------------------------------------------------------------------------|-----------------------------------------------------------------------------------------------------------------------------------------------------------------------------------------------------------------------------------------------------------------------------------------------------------------------------------------------------------------------------------------------------------------------------------------------------------------------------------------------------------------|-------------------------------------------------------------------------------------------------------------------------------------------------------------------------------------------------------------------------------------------------------------------------------------------------------------------------------------------------------------------------------------------------------------------|-------------------------------------------------------------------------------------------------------------------------------------------------------------------------------------------------------------------------------------------------------------------------------------------|-------------------------------------------------------------------------------------------------------------------------------------------------------------------------------------------------------------------------------------------------------------------------|----------------------------------------------------------------------------------------------------------------------------------------------------------------------------------------------------------------------------------------------------------------------------------------------------------------------------------------------------------------------------------------------------------|------------------------------------------------------------------------------------------------------------------------------------------------------------------------------------------------------------------------------------------------------------------------------------------------------------------------------------------------------------------------------------------------------------------------------------------------------------------------------------------------|--------------------------------------------------------------------------------------------------------------------------------------------------------------------------------------------------------------------------------------------------------------------------------------------------------------------------------------------------------|-------------------------------------------------------------------------------------------------------------------------------------------------------------------------------------------------------------------------|
| <b>C-210</b><br>OA<br>6 weeks               | OA Knee (ACR) with flare, requiring chronic NSAID/analgesic, FCC 1-3<br>Initial pain 40-100mm VAS<br>Washout-2 days<br>Assessed at baseline, 2, 6 weeks<br>double-dummy method<br>AEs observed by investigator and patient reported and laboratory tests<br>QS 5/5; VS 16/16             | Cele<br>1x200mg/day (n=145)<br>Naprox<br>2x500mg/day (n=141)<br>Plac (n=76)                                                                               | Cele 27/145<br>Naprox 39/141<br>Plac 19/76                                                                 | Cele 0/145<br>Naprox 0/141<br>Plac 5/76                                                                        | Cele 10/145<br>Naprox 15/141<br>Plac 3/76                                                                                                            | Any AE:<br>Cele 40/145<br>Naprox 65/141<br>Plac 22/76<br>GI related:<br>details not available<br>Serious:<br>No serious AEs<br>Serious UGI:<br>No serious UGI AEs                                                                                                                                                                                                                                                                                                                                               | Dyspepsia:<br>Cele 1%<br>Naprox 4%<br>Plac 0%<br>Abdom pain:<br>Cele 8%<br>Naprox 12%<br>Plac 4%<br>Details of other outcomes not available                                                                                                                                                                                                                                                                       | Mod/severe<br>abdom pain,<br>nausea,<br>dyspepsia:<br>Cele 5/145<br>Naprox 9/141<br>Plac 2/76                                                                                                                                                                                             | oedema and<br>hypertension in<br><2% in any<br>treatment group                                                                                                                                                                                                          | Abnormalities<br>seen in Hct, Hb<br>and creatinine<br>No withdrawals                                                                                                                                                                                                                                                                                                                                     | Cele 19/145<br>Naprox 34/141<br>Plac 6/76<br><br>Withdrawals:<br>Cele 7/145<br>Naprox 13/141<br>Placebo 1/76                                                                                                                                                                                                                                                                                                                                                                                   |                                                                                                                                                                                                                                                                                                                                                        |                                                                                                                                                                                                                         |
| <b>C-211</b><br>OA<br>6 weeks               | OA Knee with flare (X-ray confirmed) of NSAID requiring<br>Initial pain 40-90 on 100mm VAS<br>Washout >2 days<br>Double dummy method<br>Assessed at baseline, 2, 6 weeks<br>AEs investigator observed and patient reported and laboratory tests<br>QS 5/5; VS 16/16                      | Cele<br>1x200mg/day (n=125)<br>Naprox<br>2x500mg/day (n=129)<br>Plac (n=61)                                                                               | Cele 30/125<br>Naprox 36/129<br>Plac 16/61                                                                 | Cele 2/125<br>Naprox 3/129<br>Plac 5/61                                                                        | Cele 3/125<br>Naprox 9/129<br>Plac 1/61                                                                                                              | Any AE:<br>Cele 46/125<br>Naprox 47/129<br>Plac 17/61<br>GI related:<br>data not available<br>Serious:<br>Cele 0/125<br>Naprox 1/129<br>Placebo 0/61<br>Serious UGI:<br>Cele 0/125<br>Naprox 1/129 (GI bleed)<br>Plac 0/61                                                                                                                                                                                                                                                                                      | Dyspepsia:<br>Cele 4/125<br>Naprox 5/129<br>Plac 1/61<br>Abdom pain:<br>Cele 2/125<br>Naprox 4/129<br>Plac 0/61<br>Details of other outcomes not available                                                                                                                                                                                                                                                        | Mod/severe<br>abdom pain,<br>nausea,<br>dyspepsia:<br>Cele 3/125<br>Naprox 4/129<br>Plac 1/61                                                                                                                                                                                             | Not available                                                                                                                                                                                                                                                           | Not available                                                                                                                                                                                                                                                                                                                                                                                            | All AEs:<br>Cele 17/125<br>Naprox 26/129<br>Plac 7/61<br>Withdrawals:<br>Cele 2/125<br>Naprox 7/129<br>Plac 1/61                                                                                                                                                                                                                                                                                                                                                                               |                                                                                                                                                                                                                                                                                                                                                        |                                                                                                                                                                                                                         |
| <b>C-216</b><br>OA<br>4 weeks               | Symptomatic OA (X-ray confirmed) of NSAID requiring<br>Initial pain ≥40 on 100 mm VAS<br>Double dummy method<br>Assessed at baseline, 2, 4 weeks<br>AEs observed by investigator and laboratory tests<br>QS 5/5; VS 16/16                                                                | Cele<br>1x200mg/day (n=382)<br>Loxo<br>3x600mg/day (n=385)<br>Plac (n=192)                                                                                | Cele 35/382<br>Naprox 36/385<br>Plac 15/192                                                                | Cele 6/382<br>Loxo 3/385<br>Plac 4/192                                                                         | Cele 21/382<br>Loxo 24/385<br>Plac 7/192                                                                                                             | Any AE:<br>Cele 203/382<br>Loxo 216/384<br>Plac 100/192<br>GI-related:<br>Cele 104/382<br>Loxo 98/384<br>Plac 44/192<br>Serious:<br>Cele 1/382<br>Loxo 3/384<br>Plac 1/192<br>Serious UGI:<br>Cele 0/382<br>Loxo 0/384<br>Plac 0/192                                                                                                                                                                                                                                                                            | Dyspepsia:<br>Cele 7/382<br>Loxo 7/384<br>Plac 4/192<br>Abdom Pain:<br>Cele 35/382<br>Loxo 20/384<br>Plac 9/192<br>Nausea:<br>Cele 6/382<br>Loxo 3/384<br>Plac 3/192<br>Diarrhoea:<br>Cele 14/382<br>Loxo 19/384<br>Plac 5/192<br>Vomiting:<br>Cele 1/382<br>Loxo 1/384<br>Plac 0/192                                                                                                                             | Gastric ulcer:<br>Cele 0/382<br>Loxo 2/384<br>Plac 0/192<br>Duodenal ulcer:<br>Cele 0/382<br>Loxo 1/384<br>Plac 0/192<br>GIH:<br>Cele 0/382<br>Loxo 2/384 (but not serious)<br>Diarrhoea:<br>Cele 14/382<br>Loxo 19/384<br>Plac 5/192                                                     | Mod/severe<br>abdom pain,<br>nausea,<br>dyspepsia:<br>Cele 10/382<br>Loxo 9/384<br>Plac 3/192                                                                                                                                                                           | Generalised<br>Oedema:<br>Cele 0/382<br>Loxo 6/384<br>Plac 1/192<br>Periph Oedema:<br>Cele 0/382<br>Loxo 4/384<br>Plac 0/192<br>Facial Oedema:<br>Cele 2/382<br>Loxo 9/384<br>Plac 0/192<br>Hypertension:<br>Cele 2/382<br>Loxo 2/384<br>Plac 0/192<br>Aggravated<br>hypertension:<br>Cele 0/382<br>Loxo 0/384<br>Plac 0/192                                                                             | Trial did not<br>report any cases<br>of heart failure<br>Trial did not<br>report any cases<br>of MI<br>Hct: essentially<br>unchanged<br>Hb: small<br>changes, NS<br>between groups<br>Facial Oedema:<br>Cele 0/184<br>Para 3/185<br>Facial Oedema:<br>Cele 0/184<br>Para 1/185<br>No report of<br>hypertension<br>Aggravated<br>hypertension:<br>Cele 1/189<br>Para 1/185<br>Plac 0/182<br>Trial did not<br>report any cases<br>of heart failure<br>Trial did not<br>report any cases<br>of MI | Hct: essentially<br>unchanged<br>Hb: small<br>changes, NS<br>between groups<br>Facial Oedema:<br>Cele 0/184<br>Para 1/185<br>No report of<br>hypertension<br>Aggravated<br>hypertension:<br>Cele 1/189<br>Para 1/185<br>Plac 0/182<br>Trial did not<br>report any cases<br>of heart failure<br>Trial did not<br>report any cases<br>of MI              | Cele 124/382<br>Loxo 152/384<br>Plac 60/192<br><br>No serious<br>adverse events<br>were related to<br>the study<br>medication<br>Cele 0/192<br>Creatinine ≥300<br>micromol/L:<br>Cele 4/363<br>Loxo 7/366<br>Plac 2/186 |
| <b>C-249</b><br>OA<br>2x6 week<br>crossover | OA Hip/Knee (K-L 2-4), requiring chronic NSAID/analgesic<br>Initial pain 40-90 on 100mm (VAS)<br>Washout between treatments 3-7 days<br>Double dummy method<br>Two periods each assessed at baseline and six weeks<br>AEs investigator reported and laboratory tests<br>QS 5/5; VS 16/16 | Cele<br>1x200mg/day (n=189)<br>Para 64/185<br>Plac 69/182<br>Para<br>4x1000mg/day (n=185)<br>Cele 17/146<br>Plac (n=182)<br>(n2=91)                       | Period 1:<br>Cele 36/189<br>Para 64/185<br>Plac 69/182<br>Para<br>Cele 15/184<br>Para 10/146<br>Plac 20/91 | Period 1:<br>Cele 20/189<br>Para 28/185<br>Plac 41/182<br>Period 2:<br>Cele 6/184<br>Para 10/146<br>Plac 16/91 | Period 1:<br>Para 8/185<br>Plac 7/182<br>GI-related:<br>Cele 1/189<br>Para 4/185<br>Plac 0/182<br>Period 2:<br>Cele 4/184<br>Para 4/146<br>Plac 1/91 | Period 1:<br>Any AE:<br>Cele 56/189<br>Para 57/185<br>Plac 30/182<br>GI-related:<br>Cele 20/189<br>Para 21/185<br>Plac 13/182<br>Serious:<br>Cele 1/189<br>Para 1/185<br>Plac 0/182<br>No serious UGI<br>Period 2:<br>Any AE:<br>Cele 47/184<br>Para 30/146<br>Plac 15/184<br>Para 9/146<br>Plac 0/91<br>Serious:<br>Cele 1/184<br>Para 0/146<br>Plac 0/91<br>No serious UGI                                                                                                                                    | Period 1:<br>Dyspepsia:<br>Cele 3/189<br>Para 0/185<br>Plac 0/182<br>Abdom Pain:<br>Cele 3/189<br>Para 0/185<br>Plac 0/182<br>Nausea:<br>Cele 2/184<br>Para 1/146<br>Plac 0/91<br>Diarrhoea:<br>Cele 3/189<br>Para 0/146<br>Plac 0/91<br>Vomiting:<br>Cele 1/189<br>Para 0/146<br>Plac 0/91                                                                                                                       | Period 2:<br>Dyspepsia:<br>Cele 3/184<br>Para 0/146<br>Plac 0/91<br>Abdom Pain:<br>Cele 1/184<br>Para 0/146<br>Plac 0/91<br>Nausea:<br>Cele 2/184<br>Para 1/146<br>Plac 0/91<br>Diarrhoea:<br>Cele 3/184<br>Para 0/146<br>Plac 0/91<br>Vomiting:<br>Cele 2/184<br>Para 0/146<br>Plac 0/91 | Period 1:<br>Mod/severe<br>abdom pain,<br>nausea,<br>dyspepsia:<br>Cele 3/189<br>Para 3/185<br>Plac 0/182<br>Periods 1 and 2<br>combined:<br>Mod/severe<br>abdom pain,<br>nausea,<br>dyspepsia:<br>Cele 5/373<br>Para 3/331<br>Plac 0/273                               | Period 1:<br>Generalised<br>Oedema:<br>Cele 0/189<br>Para 3/185<br>Facial Oedema:<br>Cele 0/189<br>Para 1/185<br>Hypertension:<br>Cele 0/189<br>Para 1/185<br>Plac 0/182<br>Aggravated<br>hypertension:<br>Cele 1/189<br>Para 1/185<br>Plac 0/182<br>Trial did not<br>report any cases<br>of heart failure<br>Trial did not<br>report any cases<br>of MI                                                 | Period 2:<br>Perip Oedema:<br>Cele 4/184<br>Para 3/146<br>Plac 0/91<br>Facial Oedema:<br>Cele 0/184<br>Para 1/146<br>Plac 0/91<br>Hypertension:<br>Cele 1/189<br>Para 1/185<br>Plac 0/182<br>Aggravated<br>hypertension:<br>Cele 1/189<br>Para 1/185<br>Plac 0/182<br>Trial did not<br>report any cases<br>of heart failure<br>Trial did not<br>report any cases<br>of MI                                                                                                                      | Hct: essentially<br>unchanged<br>Hb: small<br>changes, NS<br>between groups<br>Facial Oedema:<br>Cele 0/184<br>Para 1/146<br>Plac 0/91<br>No report of<br>hypertension<br>Aggravated<br>hypertension:<br>Cele 1/189<br>Para 1/185<br>Plac 0/182<br>Trial did not<br>report any cases<br>of heart failure<br>Trial did not<br>report any cases<br>of MI | Period 1:<br>data not provided<br>Periods 1 and 2<br>combined:<br>All AEs:<br>Cele 26/373<br>Para 22/331<br>Placebo 14/273                                                                                              |
| <b>Rheumatoid arthritis</b>                 |                                                                                                                                                                                                                                                                                          |                                                                                                                                                           |                                                                                                            |                                                                                                                |                                                                                                                                                      |                                                                                                                                                                                                                                                                                                                                                                                                                                                                                                                 |                                                                                                                                                                                                                                                                                                                                                                                                                   |                                                                                                                                                                                                                                                                                           |                                                                                                                                                                                                                                                                         |                                                                                                                                                                                                                                                                                                                                                                                                          |                                                                                                                                                                                                                                                                                                                                                                                                                                                                                                |                                                                                                                                                                                                                                                                                                                                                        |                                                                                                                                                                                                                         |
| <b>C-012</b><br>RA<br>4 weeks               | RA (ACR) (min 6 months) requiring NSAID<br>FCC 1-3<br>Assessment at baseline, 1, 2, 4 weeks<br>Double dummy method<br>Washout 2 to 7 days<br>QS 5/5; VS 16/16                                                                                                                            | Cele [1]<br>2x40mg/day (n=80)<br>Cele [2]<br>2x200mg/day (n=82)<br>Cele [3]<br>2x400mg/day (n=81)<br>Plac (n=84)                                          | Cele [1] 18/80<br>Cele [2] 9/82<br>Cele [3] 10/81<br>Plac 25/84                                            | Cele [1] 14/80<br>Cele [2] 3/82<br>Cele [3] 5/81<br>Plac 15/84                                                 | Cele [1] 3/80<br>Cele [2] 4/82<br>Cele [3] 4/81<br>Plac 5/84                                                                                         | Any:<br>Cele [1] 45/80<br>Cele [2] 48/82<br>Cele [3] 43/81<br>Plac 53/84<br>GI-related:<br>Cele [1] 19/80<br>Cele [2] 16/82<br>Cele [3] 16/81<br>Plac 14/84<br>Serious:<br>None<br>No serious UGI<br>No serious CV                                                                                                                                                                                                                                                                                              | Dyspepsia:<br>Cele [1] 9/80<br>Cele [2] 8/82<br>Cele [3] 2/81<br>Plac 5/84<br>Abdom Pain:<br>Cele [1] 4/80<br>Cele [2] 2/82<br>Cele [3] 2/81<br>Plac 4/84<br>Nausea:<br>Cele [1] 3/80<br>Cele [2] 3/82<br>Cele [3] 4/81<br>Plac 5/84<br>Diarrhoea:<br>Cele [1] 5/80<br>Cele [2] 4/82<br>Cele [3] 9/81<br>Plac 2/84<br>Vomiting:<br>Cele [1] 1/80<br>Cele [2] 2/82<br>Cele [3] 1/81<br>Plac 0/84                   | Mod/severe<br>abdom pain,<br>nausea,<br>dyspepsia:<br>Cele [1] 12/80<br>Cele [2] 5/82<br>Cele [3] 2/81<br>Plac 3/84                                                                                                                                                                       | Generalised<br>oedema:<br>Cele [1] 0/80<br>Cele [2] 0/80<br>Cele [3] 1/81<br>Plac 0/84<br>Peripheral<br>hypertension:<br>Cele [1] 2/80<br>Cele [2] 1/82<br>Cele [3] 2/81<br>Plac 0/84<br>Facial Oedema:<br>Cele [1] 2/80<br>Cele [2] 2/82<br>Cele [3] 1/81<br>Plac 1/84 | Hypertension:<br>Cele [1] 0/80<br>Cele [2] 1/80<br>Cele [3] 0/81<br>Plac 0/84<br>Aggravated<br>hypertension:<br>Cele [1] 0/80<br>Cele [2] 1/80<br>Cele [3] 0/81<br>Plac 0/84                                                                                                                                                                                                                             | No clinically<br>important<br>laboratory<br>abnormalities<br>were noted                                                                                                                                                                                                                                                                                                                                                                                                                        | Cele [1] 9/80<br>Cele [2] 5/82<br>Cele [3] 8/81<br>Plac 6/84                                                                                                                                                                                                                                                                                           |                                                                                                                                                                                                                         |
| <b>C-022</b><br>RA<br>12 weeks              | RA (ACR) (min 3 months) with flare, requiring NSAID<br>FCC 1-3<br>Assessment at baseline, 2, 6, 12 weeks<br>Endoscopy at 12 weeks<br>Washout 2-7 days<br>Double dummy method<br>QS 5/5; VS16/16                                                                                          | Cele [1]<br>2x100mg/day (n=240)<br>Cele [2]<br>2x200mg/day (n=235)<br>Cele [3]<br>2x400mg/day (n=218)<br>Naprox<br>2x500mg/day (n=225)<br>Placebo (n=231) | Cele [1] 86/240<br>Cele [2] 77/235<br>Cele [3] 81/218<br>Naprox 87/225<br>Plac 130/231                     | Cele [1] 67/240<br>Cele [2] 50/235<br>Cele [3] 59/218<br>Naprox 65/225<br>Plac 104/231                         | Cele [1] 13/240<br>Cele [2] 17/235<br>Cele [3] 12/218<br>Naprox 12/225<br>Plac 11/231                                                                | Any:<br>Cele [1] 164/240<br>Cele [2] 149/235<br>Cele [3] 135/217<br>Naprox 147/225<br>Plac 152/231<br>GI-related:<br>Cele [1] 66/240<br>Cele [2] 59/235<br>Cele [3] 57/217<br>Naprox 69/225<br>Plac 45/231<br>Serious:<br>Cele [1] 4/240<br>Cele [2] 4/235<br>Cele [3] 4/217<br>Plac 3/225<br>Plac 5/231<br>Serious UGI:<br>Cele [1] 0/240<br>Cele [2] 0/235<br>Cele [3] 0/217<br>Naprox 1/225<br>Plac 0/231<br>Serious CV:<br>Cele [1] 1/240<br>Cele [2] 2/235<br>Cele [3] 1/217<br>Naprox 0/225<br>Plac 2/231 | Dyspepsia:<br>Cele [1] 24/240<br>Cele [2] 22/235<br>Cele [3] 22/217<br>Naprox 29/225<br>Plac 23/231<br>Abdom pain:<br>Cele [1] 9/240<br>Cele [2] 9/235<br>Cele [3] 10/217<br>Naprox 15/225<br>Plac 0/231<br>Nausea:<br>Cele [1] 10/240<br>Cele [2] 8/235<br>Cele [3] 7/217<br>Naprox 10/225<br>Plac 12/231<br>Diarrhoea:<br>Cele [1] 13/240<br>Cele [2] 14/235<br>Cele [3] 15/217<br>Naprox 10/225<br>Plac 12/231 | Vomiting:<br>Cele [1] 3/240<br>Cele [2] 2/235<br>Cele [3] 4/217<br>Naprox 3/225<br>Plac 2/231<br>Gastric Ulcer:<br>Cele [1] 0/240<br>Cele [2] 1/235<br>Cele [3] 0/217<br>Naprox 1/225<br>Plac 0/231                                                                                       | Mod/severe<br>abdom pain,<br>nausea,<br>dyspepsia:<br>Cele [1] 18/246<br>Cele [2] 17/235<br>Cele [3] 16/217<br>Plac 14/231                                                                                                                                              | Generalised<br>Oedema:<br>Cele [1] 1/240<br>Cele [2] 0/235<br>Cele [3] 1/217<br>Plac 0/231<br>Peripheral<br>hypertension:<br>Cele [1] 3/240<br>Cele [2] 3/235<br>Cele [3] 5/217<br>Naprox 4/225<br>Plac 0/231<br>Facial Oedema:<br>Cele [1] 0/240<br>Cele [2] 1/235<br>Cele [3] 0/217<br>Plac 1/231<br>Hypertension:<br>Cele [1] 0/240<br>Cele [2] 1/235<br>Cele [3] 2/217<br>Naprox 1/225<br>Plac 1/231 | MI:<br>Cele [1] 0/240<br>Cele [2] 1/235<br>Cele [3] 0/217<br>Plac 0/231<br>Cardiac failure:<br>no report of CF                                                                                                                                                                                                                                                                                                                                                                                 | Hct ≥5%<br>decrease:<br>Cele [1] 23/240<br>Cele [2] 29/235<br>Cele [3] 39/217<br>Plac 13/231<br><br>Hb ≥20g/L<br>decrease:<br>Cele [1] 1/240<br>Cele [2] 2/235<br>Cele [3] 4/217<br>Naprox 4/225<br>Plac 0/231                                                                                                                                         | Cele [1] 20/240<br>Cele [2] 23/235<br>Cele [3] 19/217<br>Plac 13/231                                                                                                                                                    |

|                                   |                                                                                                                                                                                                                            |                                                                                                                                                           |                                                                                          |                                                                                        |                                                                                                                                                                                                                                               |                                                                                                                                                                                                                                                                                                                                                                                                                                                                                                                      |                                                                                                                                                                                                                                                                                                              |                                                                                                                                                                                                     |                                                                                                                                                                                                                                                                                                                                                                  |                                                                                                                                                                                                                                                                                                                                                                                                                     |                                                                                                                                                                                                                                                                                                                              |                                                                                                                                                                        |                                                                                       |
|-----------------------------------|----------------------------------------------------------------------------------------------------------------------------------------------------------------------------------------------------------------------------|-----------------------------------------------------------------------------------------------------------------------------------------------------------|------------------------------------------------------------------------------------------|----------------------------------------------------------------------------------------|-----------------------------------------------------------------------------------------------------------------------------------------------------------------------------------------------------------------------------------------------|----------------------------------------------------------------------------------------------------------------------------------------------------------------------------------------------------------------------------------------------------------------------------------------------------------------------------------------------------------------------------------------------------------------------------------------------------------------------------------------------------------------------|--------------------------------------------------------------------------------------------------------------------------------------------------------------------------------------------------------------------------------------------------------------------------------------------------------------|-----------------------------------------------------------------------------------------------------------------------------------------------------------------------------------------------------|------------------------------------------------------------------------------------------------------------------------------------------------------------------------------------------------------------------------------------------------------------------------------------------------------------------------------------------------------------------|---------------------------------------------------------------------------------------------------------------------------------------------------------------------------------------------------------------------------------------------------------------------------------------------------------------------------------------------------------------------------------------------------------------------|------------------------------------------------------------------------------------------------------------------------------------------------------------------------------------------------------------------------------------------------------------------------------------------------------------------------------|------------------------------------------------------------------------------------------------------------------------------------------------------------------------|---------------------------------------------------------------------------------------|
| <b>C-023</b><br>RA<br>12 weeks    | RA (ACR) (min 3 months) with flare requiring NSAID<br>FCC 1-3<br>Assessment at baseline, 2, 5, 12 weeks<br>Washout 2-7 days<br>Double dummy method.<br>OS 5/5; VS 16/16                                                    | Cele [1]<br>2x100mg/day (n=228)<br>Cele [2]<br>2x200mg/day (n=218)<br>Cele [3]<br>2x400mg/day (n=217)<br>Naprox<br>2x500mg/day (n=218)<br>Placebo (n=221) | Cele [1] 11/1/228<br>Cele [2] 94/218<br>Cele [3] 91/217<br>Naprox 85/218<br>Plac 143/221 | Cele [1] 92/228<br>Cele [2] 74/218<br>Cele [3] 69/217<br>Naprox 69/218<br>Plac 125/221 | Cele [1] 12/228<br>Cele [2] 16/218<br>Cele [3] 16/217<br>Naprox 16/218<br>Plac 12/221                                                                                                                                                         | Any:<br>Cele [1] 130/228<br>Cele [2] 126/218<br>Cele [3] 134/218<br>Naprox 133/218<br>Plac 114/221<br>GI-related:<br>Cele [1] 52/228<br>Cele [2] 51/218<br>Cele [3] 52/217<br>Naprox 51/218<br>Plac 39/221<br>Serious:<br>Cele [1] 2/228<br>Cele [2] 1/218<br>Cele [3] 2/217<br>Naprox 3/218<br>Plac 2/221<br>Serious UGI:<br>Cele [1] 0/228<br>Cele [2] 0/218<br>Cele [3] 0/217<br>Naprox 1/218<br>Placebo 2/221<br>Serious CV:<br>Cele [1] 1/228<br>Cele [2] 0/218<br>Cele [3] 2/217<br>Naprox 1/218<br>Plac 0/221 | Dyspepsia:<br>Cele [1] 23/228<br>Cele [2] 18/218<br>Cele [3] 16/217<br>Naprox 29/218<br>Plac 13/221<br>Abdom pain:<br>Cele [1] 10/228<br>Cele [2] 4/218<br>Cele [3] 5/217<br>Naprox 3/218<br>Plac 6/221<br>Nausea:<br>Cele [1] 9/228<br>Cele [2] 7/218<br>Cele [3] 11/217<br>Naprox 8/218<br>Plac 11/221     | Diarrhoea:<br>Cele [1] 13/228<br>Cele [2] 10/218<br>Cele [3] 13/217<br>Naprox 8/218<br>Plac 10/221<br>Vomiting:<br>Cele [1] 1/228<br>Cele [2] 2/218<br>Cele [3] 7/217<br>Naprox 3/218<br>Plac 3/221 | Mod/severe<br>abdom pain,<br>nausea,<br>dyspepsia:<br>Cele [1] 17/228<br>Cele [2] 8/218<br>Cele [3] 11/217<br>Naprox 20/218<br>Plac 13/221                                                                                                                                                                                                                       | Generalised<br>oedema:<br>Cele [1] 0/228<br>Cele [2] 0/218<br>Cele [3] 1/217<br>Naprox 0/218<br>Plac 1/221<br>Facial oedema:<br>Cele [1] 3/228<br>Cele [2] 3/218<br>Cele [3] 6/217<br>Naprox 2/218<br>Plac 4/221<br>MI:<br>Cele [1] 1/228<br>Cele [2] 0/218<br>Cele [3] 1/217<br>Naprox 0/218<br>Plac 0/221<br>Cardiac failure:<br>Cele [1] 0/228<br>Cele [2] 0/218<br>Cele [3] 0/217<br>Naprox 1/218<br>Plac 0/221 | Hypertension:<br>Cele [1] 0/228<br>Cele [2] 2/218<br>Cele [3] 1/217<br>Naprox 0/218<br>Plac 1/221<br>Aggravated<br>hypertension:<br>Cele [1] 1/228<br>Cele [2] 1/218<br>Cele [3] 1/217<br>Naprox 0/218<br>Plac 0/221<br>Cardiac failure:<br>Cele [1] 0/228<br>Cele [2] 0/218<br>Cele [3] 0/217<br>Naprox 1/218<br>Plac 0/221 | Hct <5%<br>decrease:<br>Cele [1] 15/228<br>Cele [2] 15/218<br>Cele [3] 21/217<br>Naprox 16/218<br>Plac 11/221<br>Hb >20g/L<br>decrease:<br>less than 1% of<br>patients | Cele [1] 17/228<br>Cele [2] 12/218<br>Cele [3] 20/217<br>Naprox 24/218<br>Plac 15/221 |
| <b>C-041</b><br>RA<br>6 months    | RA (ACR) (min 6 months) requiring NSAID<br>FCC 1-3<br>Assessment at baseline, weeks, 4, 8, 12, 16, 20 and 24 weeks<br>Endoscopy 24 weeks<br>Washout* - no investig drug <30days<br>Double dummy method<br>OS 5/5; VS 16/16 | Cele<br>2x200mg/day (n=326)<br>Diclo SR<br>2x75mg/day (n=329)                                                                                             | Cele 68/326<br>Diclo 94/329                                                              | Cele 26/326<br>Diclo 22/329                                                            | Cele 34/326<br>Diclo 64/329                                                                                                                                                                                                                   | Any:<br>Cele 222/326<br>Diclo 239/329<br>GI-related:<br>Cele 118/326<br>Diclo 159/329<br>Serious:<br>Cele 14/326<br>Diclo 16/329<br>Serious UGI:<br>Cele 0/326<br>Diclo 5/329<br>Serious CV:<br>Cele 1/326<br>Diclo 1/329                                                                                                                                                                                                                                                                                            | Dyspepsia:<br>Cele 34/326<br>Diclo 42/329<br>Abdom pain:<br>Cele 36/326<br>Diclo 68/329<br>Nausea:<br>Cele 15/326<br>Diclo 27/329<br>Diarrhoea:<br>Cele 39/326<br>Diclo 46/329<br>Vomiting:<br>Cele 0/326<br>Diclo 17/329                                                                                    | Duodenal ulcer:<br>Cele 2/269<br>Naprox 2/267<br>Gastric ulcer:<br>Cele 0/326<br>Diclo 9/329<br>Haemorrhagic<br>Gastritis:<br>Cele 0/326<br>Diclo 1/329                                             | Mod/severe<br>abdom pain,<br>nausea,<br>dyspepsia:<br>Cele 31/326<br>Diclo 77/329                                                                                                                                                                                                                                                                                | Generalised<br>oedema:<br>Cele 0/326<br>Diclo 2/329<br>Peripheral<br>oedema:<br>Cele 11/326<br>Diclo 5/329<br>Facial oedema:<br>Cele 1/326<br>Diclo 2/329<br>Hypertension:<br>Cele 4/326<br>Diclo 5/329<br>MI:<br>Cele 1/326<br>Diclo 0/329<br>Cardiac failure:<br>Cele 2/326<br>Diclo 1/329                                                                                                                        | Hct <5%<br>decrease:<br>Cele 35/329<br>Cele 25/326<br>Diclo 57/329<br>Hb >20g/L<br>decrease:<br>Cele 14/326<br>Diclo 18/329<br>Creatinine<br>>1.3xULN:<br>Cele 4/326<br>Diclo 2/329                                                                                                                                          | Cele 74/326<br>Diclo 97/329                                                                                                                                            |                                                                                       |
| <b>C-062</b><br>OA/RA<br>12 weeks | OA/RA (ACR) (min 3 months) with flare<br>FCC 1-3<br>Assessed (including endoscopy) at baseline, 4, 8, 12 weeks<br>Washout >30 days for naprox<br>OS 5/5; VS 16/16                                                          | Cele<br>2x200mg/day (n=269)<br>Diclo<br>2x75mg/day (n=267)                                                                                                | Cele 59/269<br>Naprox 118/267                                                            | Cele 17/269<br>Diclo 10/387<br>Ibu 14/345                                              | Cele 19/269<br>Naprox 24/267<br>Ibu 37/345<br>GI-related:<br>Cele 11/269<br>Diclo 16/267<br>plus endoscopic<br>ulcer:<br>Cele 12/269<br>Ibu 6/267<br>Serious UGI:<br>Cele 1/269<br>Naprox 1/267<br>Serious CV:<br>Cele 2/269<br>Naprox 4/267  | Dyspepsia:<br>Cele 34/269<br>Naprox 29/267<br>Abdom Pain:<br>Cele 23/269<br>Diclo 33/267<br>GI-related:<br>Cele 9/269<br>Naprox 23/267<br>Diarrhoea:<br>Cele 11/269<br>Naprox 17/267<br>Vomiting:<br>Cele 0/269<br>Naprox 4/267                                                                                                                                                                                                                                                                                      | Duodenal ulcer:<br>Cele 2/269<br>Naprox 2/267<br>Gastric ulcer:<br>Cele 1/269<br>Naprox 1/267<br>Haemorrhagic<br>Gastritis:<br>Cele 1/269<br>Naprox 1/267<br>Peptic ulcer:<br>Cele 0/269<br>Naprox 1/267                                                                                                     | Mod/severe<br>abdom pain,<br>nausea,<br>dyspepsia:<br>Cele 20/269<br>Naprox 35/267                                                                                                                  | Peripheral<br>oedema:<br>Cele 8/269<br>Naprox 8/267<br>Hypertension:<br>Cele 5/269<br>Naprox 3/267<br>Aggravated<br>hypertension:<br>Cele 1/269<br>Naprox 1/267<br>Anasemia:<br>Cele 0/269<br>Naprox 4/267                                                                                                                                                       | MI:<br>Cele 1/269<br>Naprox 1/267<br>No report of CHF<br>Hypertension:<br>Cele 2/365<br>Diclo 0/387<br>Cele 0/345<br>Cardiac Failure:<br>Cele 1/365<br>Diclo 0/387<br>Ibu 0/345<br>Generalised<br>oedema:<br>Cele 0/365<br>Diclo 0/387<br>Ibu 1/345<br>Hypertension:<br>Cele 5/365<br>Diclo 2/387<br>Ibu 2/345                                                                                                      | Hct <5%<br>decrease:<br>Cele 77/365<br>Diclo 103/387<br>Hb >20g/L:<br>Cele 6/269<br>Naprox 7/267<br>Creatinine<br>>1.3xULN:<br>Cele 3/269<br>Naprox 1/267<br>No lab findings<br>considered<br>clinically sig and<br>no pattern<br>suggesting any<br>changes due to<br>drug-related<br>process                                | Cele 29/269<br>Naprox 49/267<br>Ibu 52/345                                                                                                                             |                                                                                       |
| <b>C-071</b><br>OA/RA<br>12 weeks | OA/RA (ACR) (min 3 months) requiring NSAID<br>FCC 1-3<br>Assessed (including endoscopy) at baseline, 4, 8, 12 weeks<br>Washout >30 days for chronic diclo or ibu<br>OS 5/5; VS 16/16                                       | Cele<br>2x200mg/day (n=365)<br>Diclo<br>2x75mg/day (n=387)<br>Ibu 3x800mg/day (n=345)                                                                     | Cele 77/365<br>Diclo 99/387<br>Ibu 115/345                                               | Cele 18/365<br>Diclo 10/387<br>Ibu 14/345                                              | Cele 22/365<br>Diclo 37/387<br>Ibu 37/345<br>GI-related:<br>Cele 11/365<br>Diclo 22/387<br>Ibu 26/345<br>plus endoscopic<br>ulcers:<br>Cele 19/365<br>Diclo 27/387<br>Ibu 47/345<br>Serious UGI:<br>Cele 1/365 (GH)<br>Ibu 0/345              | Dyspepsia:<br>Cele 34/365<br>Diclo 42/387<br>Ibu 44/345<br>Abdom Pain:<br>Cele 22/365<br>Diclo 35/387<br>Ibu 41/345<br>Nausea:<br>Cele 12/365<br>Diclo 13/387<br>Ibu 23/345<br>Diarrhoea:<br>Cele 20/365<br>Diclo 36/387<br>Ibu 20/345                                                                                                                                                                                                                                                                               | Vomiting:<br>Cele 5/365<br>Diclo 8/387<br>Ibu 6/345<br>Gastric ulcer:<br>Cele 0/365<br>Diclo 0/387<br>Ibu 1/345<br>Haemorrhagic:<br>Cele 1/365<br>Diclo 0/387<br>Ibu 1/345                                                                                                                                   | Mod/severe<br>abdom pain,<br>nausea,<br>dyspepsia:<br>Cele 33/365<br>Diclo 49/387<br>Ibu 40/345                                                                                                     | Peripheral<br>oedema:<br>Cele 6/365<br>Diclo 4/387<br>Ibu 12/345<br>Facial oedema:<br>Cele 1/365<br>Diclo 1/387<br>Ibu 2/345<br>Generalised<br>oedema:<br>Cele 0/365<br>Diclo 1/387<br>Ibu 0/345<br>Hypertension:<br>Cele 5/365<br>Diclo 2/387<br>Ibu 2/345                                                                                                      | Aggravated<br>hypertension:<br>Cele 2/365<br>Diclo 0/387<br>Ibu 0/345<br>Cardiac Failure:<br>Cele 0/365<br>Diclo 0/387<br>Ibu 1/345<br>MI:<br>Cele 0/365<br>Diclo 0/387<br>Ibu 0/345<br>Generalised<br>oedema:<br>Cele 0/365<br>Diclo 0/387<br>Ibu 1/345<br>Hypertension:<br>Cele 5/365<br>Diclo 2/387<br>Ibu 2/345                                                                                                 | Hct <5%<br>decrease:<br>Cele 77/365<br>Diclo 103/387<br>Hb >20g/L:<br>Cele 15/345<br>Ibu 15/345<br>Creatinine<br>>1.3xULN:<br>Cele 4/387<br>Ibu 8/345<br>No lab findings<br>considered<br>clinically sig and<br>no pattern<br>suggesting any<br>changes due to<br>drug-related<br>process                                    | Cele 28/365<br>Diclo 49/387<br>Ibu 52/345                                                                                                                              |                                                                                       |
| <b>C-102</b><br>OA/RA<br>52 weeks | OA/RA (documented) (min 3 months) requiring NSAID<br>FCC 1-3<br>Assessed at baseline 13, 26, 39, 52 weeks<br>Washout 30 days<br>OS 5/5; VS 16/16                                                                           | Cele<br>2x400mg/day (n=388)<br>Ibu 3x800<br>mg/day (n=1985)<br>Diclo<br>2x75mg/day (n=1996)<br>OS 5/5; VS 16/16                                           | Cele 2208/3987<br>Ibu 1294/1985<br>Diclo 1057/1996                                       | Cele 2208/3987<br>Ibu 1294/1985<br>Diclo 1057/1996                                     | Any:<br>Cele 892/3987<br>Ibu 456/1985<br>Diclo 529/1996<br>GI-related:<br>Cele 1819/3987<br>Ibu 917/1985<br>Cele 1097/1996<br>Diclo 270/3987<br>Ibu 119/1985<br>Diclo 111/1996<br>Serious UGI:<br>Cele 4/3987<br>Ibu 19/1985<br>Diclo 23/1996 | Dyspepsia:<br>Cele 659/3987<br>Ibu 328/1985<br>Diclo 390/1996<br>Abdom Pain:<br>Cele 466/3987<br>Ibu 225/1985<br>Diclo 370/1996<br>Nausea:<br>Cele 329/3987<br>Ibu 178/1985<br>Diclo 242/1996<br>Diarrhoea:<br>Cele 434/3987<br>Ibu 148/1985<br>Diclo 299/1996<br>Vomiting:<br>Cele 103/3987<br>Ibu 53/1985<br>Diclo 69/1996                                                                                                                                                                                         | Duodenal Ulcer:<br>Cele 17/3987<br>Ibu 6/1985<br>Diclo 8/1996<br>Duodenal<br>bleeding:<br>Cele 0/3987<br>Ibu 1/1985<br>Gastric Ulcer:<br>Cele 21/3987<br>Ibu 25/1985<br>Diclo 16/1996<br>Gastric bleeding:<br>Cele 5/3987<br>Ibu 2/1985<br>Diclo 0/1996<br>GIH:<br>Cele 9/3987<br>Ibu 2/1985<br>Diclo 2/1996 | Clin sig UGI<br>event (Trad<br>definition)<br>Cele 20/3987<br>Ibu 13/1985<br>Diclo 11/1996                                                                                                          | Generalised<br>Oedema:<br>Cele 19/3987<br>Ibu 20/1985<br>Diclo 11/1996<br>Peripheral<br>Oedema:<br>Cele 14/3987<br>Ibu 104/1985<br>Diclo 70/1996<br>Facial Oedema:<br>Cele 21/3987<br>Ibu 8/1985<br>Diclo 4/1996<br>Aggravated<br>Hypertension:<br>Cele 78/3987<br>Ibu 61/1985<br>Diclo 40/1996<br>Hypertension:<br>Cele 32/3987<br>Ibu 24/1985<br>Diclo 12/1996 | Cardiac Failure:<br>Cele 12/3987<br>Ibu 9/1985<br>Diclo 3/1996<br>MI:<br>Cele 19/3987<br>Ibu 9/1985<br>Diclo 5/1996<br>Facial Oedema:<br>Cele 21/3987<br>Ibu 8/1985<br>Diclo 4/1996<br>Hypertension:<br>Cele 78/3987<br>Ibu 61/1985<br>Diclo 40/1996<br>Aggravated<br>Hypertension:<br>Cele 32/3987<br>Ibu 24/1985<br>Diclo 12/1996                                                                                 | Hct <5%<br>decrease:<br>Cele 12/3987<br>Ibu 4/3701<br>Diclo 2/1802<br>MI:<br>Cele 5/1849<br>Hb <8 or 30g/L<br>decrease:<br>Cele 9/3708<br>Ibu 7/1905<br>Diclo 9/1851<br>Creatinine >300<br>ULN:<br>Cele 67/3967<br>Ibu 271/759<br>Diclo 33/1840                                                                              | Cele 18/327<br>Diclo 20/330                                                                                                                                            |                                                                                       |
| <b>C-105</b><br>OA/RA<br>12 weeks | OA/RA (Documented >3 months) requiring NSAID<br>FCC 1-3<br>Assessment at baseline, 4, 8, 12 weeks<br>Endoscopy at baseline, 12 weeks<br>Double dummy method<br>Washout >30 days for diclo<br>OS 5/5; VS 16/16              | Cele<br>2x100mg/day (n=327)<br>Diclo<br>2x50mg/day (n=330)                                                                                                | Cele 37/327<br>Diclo 40/330                                                              | Cele 11/327<br>Diclo 7/330                                                             | Cele 12/327<br>Diclo 18/330<br>GI-related:<br>Cele 7/327<br>Diclo 14/330<br>Serious:<br>Cele 2/327<br>Diclo 4/330<br>Serious GI:<br>Cele 2/327<br>Diclo 1/330                                                                                 | Dyspepsia:<br>Cele 9/327<br>Diclo 16/330<br>Abdom Pain:<br>Cele 43/327<br>Diclo 62/330<br>Nausea:<br>Cele 8/327<br>Diclo 12/330<br>Diarrhoea:<br>Cele 6/327<br>Diclo 5/330<br>Vomiting:<br>Cele 6/327<br>Diclo 5/330                                                                                                                                                                                                                                                                                                 | Gastric ulcer:<br>Cele 0/327<br>Diclo 2/330<br>dyspepsia:<br>Cele 0/327<br>Diclo 2/330<br>Duodenal ulcer:<br>Cele 0/327<br>Diclo 1/330                                                                                                                                                                       | Mod/severe<br>abdom pain,<br>nausea,<br>dyspepsia:<br>Cele 20/327<br>Diclo 30/330                                                                                                                   | Peripheral<br>oedema:<br>Cele 2/327<br>Diclo 3/330<br>Facial oedema:<br>Cele 4/327<br>Diclo 1/330<br>Oedema:<br>Cele 0/327<br>Diclo 3/330<br>Hypertension:<br>Cele 7/327<br>Diclo 12/330                                                                                                                                                                         | Hct<br><5%decrease:<br>Cele 30/327<br>Diclo 31/330<br>Hb >20g/L<br>decrease:<br>Cele 32/327<br>Diclo 40/330<br>Creatinine<br>>1.3xULN:<br>Cele 1/327<br>Diclo 0/330                                                                                                                                                                                                                                                 | Cele 18/327<br>Diclo 20/330                                                                                                                                                                                                                                                                                                  |                                                                                                                                                                        |                                                                                       |

|              |                                                                                                                                                                            |                                                |                      |                     |                                                                                                                                                    |                                                                                                                                                        |                                                                                                                                             |                                                               |                                                                                                            |                                                                                                                  |                                                                                                                         |                     |
|--------------|----------------------------------------------------------------------------------------------------------------------------------------------------------------------------|------------------------------------------------|----------------------|---------------------|----------------------------------------------------------------------------------------------------------------------------------------------------|--------------------------------------------------------------------------------------------------------------------------------------------------------|---------------------------------------------------------------------------------------------------------------------------------------------|---------------------------------------------------------------|------------------------------------------------------------------------------------------------------------|------------------------------------------------------------------------------------------------------------------|-------------------------------------------------------------------------------------------------------------------------|---------------------|
| <b>C-106</b> | OA/RA (Documented), requiring NSAID FCC 1-3 Assessment at baseline, 4, 8, 12 weeks Endoscopy at baseline and 12 weeks Double dummy method Washout ≥30 days for dico        | Cele 2x100mg/day (n=63) Dico 2x50mg/day (n=61) | Cele 7/63 Dico 11/61 | Cele 1/63 Dico 4/61 | Cele 1/63 Dico 4/61 GI-related: Cele 0/63 Dico 3/61                                                                                                | Any: Cele 28/63 GI-related: Cele 9/63 Dico 17/61 Serious: Cele 2/63 Dico 1/61 Serious UGI: Cele 0/63 Dico 0/61                                         | Dyspepsia: None reported Abdom Pain: Cele 0/63 Dico 1/61 Nausea: Cele 2/63 Dico 1/61 Diarrhoea: Cele 2/63 Dico 3/61 Vomiting: None reported | Haemorrhagic gastric ulcer: Cele 0/63 Dico 1/61               | Mod/severe abdom pain, nausea, dyspepsia: Cele 0/63 Dico 2/61 "Mod/severe GI related": Cele 0/63 Dico 6/61 | Facial oedema: Cele 2/63 Dico 0/61 Peripheral oedema: Cele 0/63 Dico 3/61 No reports of hypertension or CHF ??MI | Hct ≥5% decrease: Cele 2/63 Dico 2/61 Hb ≥20 g/L decrease: Cele 0/63 Dico 0/61 Creatinine ≥1.3xULN: Cele 0/63 Dico 0/61 | Cele 2/63 Dico 2/61 |
|              | QS 5/5; VS 16/16                                                                                                                                                           |                                                |                      |                     |                                                                                                                                                    |                                                                                                                                                        |                                                                                                                                             |                                                               |                                                                                                            |                                                                                                                  |                                                                                                                         |                     |
| <b>C-107</b> | OA/RA (Documented ≥3 months), requiring NSAID, FC 1-3 Assessment at baseline, 4, 8, 12 weeks Endoscopy at baseline, 12 weeks Double dummy method Washout ≥30 days for dico | Cele 2x100mg/day (n=44) Dico 2x50mg/day (n=44) | Cele 6/44 Dico 9/44  | Cele 1/44 Dico 2/44 | Cele 2/44 Dico 5/44 GI-related: Cele 2/44 Dico 3/44 Serious: Cele 2/44 Dico 11/44 Serious UGI: Cele 1/44 Dico 0/44 Serious CV: Cele 1/44 Dico 1/44 | Any: Cele 28/44 Dico 32/44 GI-related: Cele 13/44 Dico 11/44 Serious: Cele 2/44 Dico 4/44 Diarrhoea: Cele 1/44 Dico 0/44 Vomiting: Cele 4/44 Dico 1/44 | Dyspepsia: Cele 0/44 Dico 5/44 Abdom pain: Cele 13/44 Dico 3/44 Nausea: Cele 2/44 Dico 1/44 Diarrhoea: Cele 2/44 Dico 2/44                  | Mod/severe abdom pain, nausea, dyspepsia: Cele 7/44 Dico 6/44 | Facial oedema: Cele 0/44 Dico 1/44 Hypertension: Cele 1/44 Dico 1/44 No report of MI or CHF                | Week 12 Hct ≥5% decrease: Cele 1/44 Dico 0/44 Hb ≥20g/L decrease: None Creatinine ≥1.3xULN: None                 | Cele 7/44 Dico 13/44                                                                                                    |                     |
|              | QS 5/5; VS 16/16                                                                                                                                                           |                                                |                      |                     |                                                                                                                                                    |                                                                                                                                                        |                                                                                                                                             |                                                               |                                                                                                            |                                                                                                                  |                                                                                                                         |                     |

Abdom = abdominal; ACR = American College of Rheumatology; AE = adverse event; BP = blood pressure; Cele = celecoxib; CF = cardiac failure; CHF = chronic heart failure; Clin = clinically; CV = cardiovascular; Dico = diclofenac; GI = gastrointestinal; GIH = gastrointestinal haemorrhage; GIH = gastrointestinal haemorrhage; Hct = haematocrit; Ibu = ibuprofen; K-L = Kellgren-Lawrence; Loxo = loxoprofen; MI = myocardial infarction; Mod = moderate; Naprox, Nap = naproxen; NSAID = nonsteroidal anti-inflammatory drug; OA = osteoarthritis; Para = paracetamol; Para = paracetamol; periph = peripheral; Plac = placebo; QS = quality score; Rofe = rofecoxib; sig = significant; Trad = traditional; UGI = upper gastrointestinal; VAS = visual analogue scale; VS = validity score.
